# Supplementary material
Source: Royal Society of Chemistry journal article supplement (doi:10.1039/d6cc01271j)
Supplement: d6cc01271j1.pdf [file d6cc01271j1.pdf]

**Supporting Information for:**

**Metallopeptide-Based Mimics Suggest Substrate  
Orientation Directs Sulphur Oxidation vs  
Hydrogen Atom Abstraction Reactions in  
Mononuclear Non-Haem Iron Dioxygenases**

Jason Shearer ,\* Sara Bassiri, Kendal Southwell, and Dovydas Vasiliauskas

*Department of Chemistry, Trinity University, San Antonio, TX 78212, USA*

E-mail: jshearer@trinity.edu

## Table of Contents

|                    |                                                                                                          |             |
|--------------------|----------------------------------------------------------------------------------------------------------|-------------|
| Methods            | Metallopeptide Preparation, Oxidation and Analysis                                                       | S-5 – S-14  |
| Methods            | Computational Details (hybrid-DFT)                                                                       | S-14 – S-15 |
| Methods            | Computational Details (AILFT and $1s \rightarrow 3d$ Multiplet Analysis)                                 | S-20 – S-21 |
| <b>Figure S1.</b>  | HPLC and ESI-MS of nh1                                                                                   | S-5         |
| <b>Figure S2.</b>  | HPLC and ESI-MS of nh2                                                                                   | S-6         |
| <b>Figure S3.</b>  | GPC Results of Peptide and Metallopeptides.                                                              | S-6         |
| <b>Figure S4.</b>  | Titration of Fe(II) against nh1 solutions.                                                               | S-7         |
| <b>Figure S5.</b>  | Titration of Fe(II) against nh2 solutions.                                                               | S-8         |
| <b>Figure S6.</b>  | Electronic absorption and CD spectra of metallopeptide solutions.                                        | S-10        |
| <b>Figure S7.</b>  | Fe L-edge Results.                                                                                       | S-14        |
| <b>Figure S8.</b>  | Plots of the five highest energy QROs for $\{\text{Fe(II)(nh1)(OH}_2\}\}$ .                              | S-16        |
| <b>Figure S9.</b>  | Plots of the five highest energy QROs for $\{\text{Fe(II)(nh2)(OH}_2\}\}$ .                              | S-17        |
| <b>Figure S10.</b> | Plots of the five highest energy QROs for $\{\text{Fe(III)(nh1)(O}_2\}\}$ .                              | S-18        |
| <b>Figure S11.</b> | Plots of the five highest energy QROs for $\{\text{Fe(II)(nh2)(O}_2\}\}$ .                               | S-19        |
| <b>Figure S12.</b> | Plots of the purified 3d orbitals for minimized $\{\text{Fe(II)(nh1)(OH}_2\}\}$ .                        | S-23        |
| <b>Figure S13.</b> | Simulations of Fe K-edge pre-edge feature                                                                | S-23        |
| <b>Figure S14.</b> | Plots of the purified 3d orbitals for minimized $\{\text{Fe(II)(nh2)(OH}_2\}\}$ .                        | S-24        |
| <b>Figure S15.</b> | Simulations of Fe K-edge pre-edge feature                                                                | S-24        |
| <b>Figure S16.</b> | ESI-MS of major soluble product from $^{16}\text{O}_2$<br>oxidation of $\{\text{Fe(II)(nh1)(OH}_2\}\}$ . | S-25        |
| <b>Figure S17.</b> | ESI-MS of major soluble product from $^{18}\text{O}_2$<br>oxidation of $\{\text{Fe(II)(nh1)(OH}_2\}\}$ . | S-25        |
| <b>Figure S18.</b> | ESI-MS of minor soluble product from $^{16}\text{O}_2$<br>oxidation of $\{\text{Fe(II)(nh1)(OH}_2\}\}$ . | S-26        |
| <b>Figure S19.</b> | ESI-MS of minor soluble product from $^{18}\text{O}_2$<br>oxidation of $\{\text{Fe(II)(nh1)(OH}_2\}\}$ . | S-26        |

|                    |                                                                                                                                                                 |      |
|--------------------|-----------------------------------------------------------------------------------------------------------------------------------------------------------------|------|
| <b>Figure S20.</b> | MALDI-TOF-MS of the insoluble products from O <sub>2</sub> oxidation of {Fe(II)(nh1)(OH <sub>2</sub> )}.                                                        | S-27 |
| <b>Figure S21.</b> | MALDI-TOF-MS of the insoluble products from O <sub>2</sub> oxidation of {Fe(II)(nh2)(OH <sub>2</sub> )}.                                                        | S-27 |
| <b>Figure S22.</b> | {Fe(II)(nh1)(O <sub>2</sub> <sup>-</sup> )} vs {Fe(II)(nh2)(O <sub>2</sub> <sup>-</sup> )} ligand constraints orientation of CDO vs IPNS S(3p <sub>π</sub> ) MO | S-28 |
| <b>Table S1.</b>   | Reported and alternative EXAFS fits for {Fe(II)(nh1)(OH <sub>2</sub> )}                                                                                         | S-11 |
| <b>Table S2.</b>   | Reported and alternative EXAFS fits for {Fe(II)(nh2)(OH <sub>2</sub> )}                                                                                         | S-12 |
| <b>Table S3.</b>   | Calculated Fe-ligand bond lengths of metallopeptide models                                                                                                      | S-15 |
| <b>Table S4.</b>   | AILFT results                                                                                                                                                   | S-22 |
| <b>Table S5.</b>   | Results from Tanabe-Sugano Analysis of the Fe K-edge pre-edge features                                                                                          | S-22 |
| <b>Table S6.</b>   | Cartesian coordinates of geometry optimized structure of {Fe(II)(nh1)(OH <sub>2</sub> )}                                                                        | S-29 |
| <b>Table S7.</b>   | Cartesian coordinates of geometry optimized structure of {Fe(II)(nh2)(OH <sub>2</sub> )}                                                                        | S-33 |
| <b>Table S8.</b>   | Cartesian coordinates of geometry optimized structure of minimized {Fe/Co(II)(nh1)(OH <sub>2</sub> )}                                                           | S-37 |
| <b>Table S9.</b>   | Cartesian coordinates of geometry optimized structure of minimized {Fe/Co(II)(nh1)(OH <sub>2</sub> )}                                                           | S-39 |
| <b>Table S10.</b>  | Cartesian coordinates of geometry optimized structure of low-spin {Fe(III)(nh1)(O <sub>2</sub> )}                                                               | S-41 |
| <b>Table S11.</b>  | Cartesian coordinates of geometry optimized structure of intermediate-spin {Fe(III)(nh1)(O <sub>2</sub> )}                                                      | S-45 |
| <b>Table S12.</b>  | Cartesian coordinates of geometry optimized structure of high-spin {Fe(III)(nh1)(O <sub>2</sub> )}                                                              | S-49 |
| <b>Table S13.</b>  | Cartesian coordinates of geometry optimized structure of low-spin                                                                                               |      |

|                    |                                                                                                            |      |
|--------------------|------------------------------------------------------------------------------------------------------------|------|
|                    | {Fe(III)(nh2)(O <sub>2</sub> )}                                                                            | S-53 |
| <b>Table S14.</b>  | Cartesian coordinates of geometry optimized structure of intermediate-spin {Fe(III)(nh2)(O <sub>2</sub> )} | S-57 |
| <b>Table S15.</b>  | Cartesian coordinates of geometry optimized structure of high-spin {Fe(III)(nh2)(O <sub>2</sub> )}         | S-61 |
| <b>References.</b> |                                                                                                            | S-65 |

## Materials, Method and Additional Results

**Generation of Metallopeptides.** High purity peptides (purity > 98%) nh1 (HCDLPHA) and nh2 (HHDLPCA) were obtained from GenScript custom peptide synthesis, and were used as received following an assessment of their purity and composition by LC/MS (Figures S1 – S3). Both ESI-MS and gel-permeation chromatography (GPC) studies indicate the lack of intermolecular disulphide bonds have formation. Peptide solutions were generated and manipulated in a COY anoxic chamber under an atmosphere of 97:3 N<sub>2</sub>:H<sub>2</sub> at a pH = 8.0 maintained using a 50 mM NEM buffer. Water used to generate all solutions was purified to a resistance of at least 18 MΩ·cm. All peptide concentrations were determined using an Ellman’s assay.<sup>1</sup>

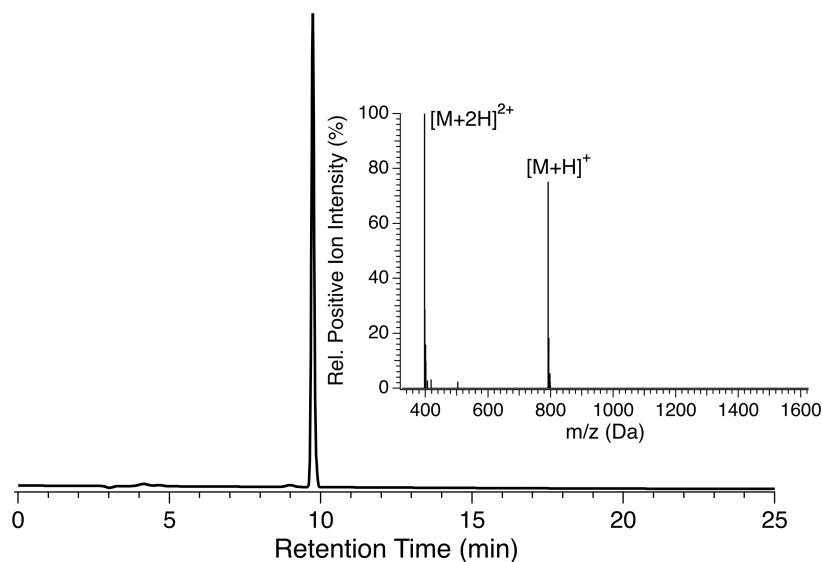

**Figure S1.** HPLC (left) and positive ion-mode ESI-MS (right) of nh1. LC/MS data were obtained on an Agilent 6230 Electrospray Ionization Time-of-Flight Mass Spectrometer with an Agilent 1260 Infinity II HPLC equipped with a Waters XTerra C-18 analytical column (4.6 × 150 mm; 5 μm). A linear gradient of 10 - 65% MeCN in water (0.1% formic acid) over 25 min was used.

The stoichiometry between Fe<sup>2+</sup> and peptides were obtained using electronic absorption spectroscopy on a JASCO V730 UV/Vis-NIR spectrometer housed in a COY chamber. Aliquots of ferrous chloride tetrahydrate in water (50 mM stock solution) were added to

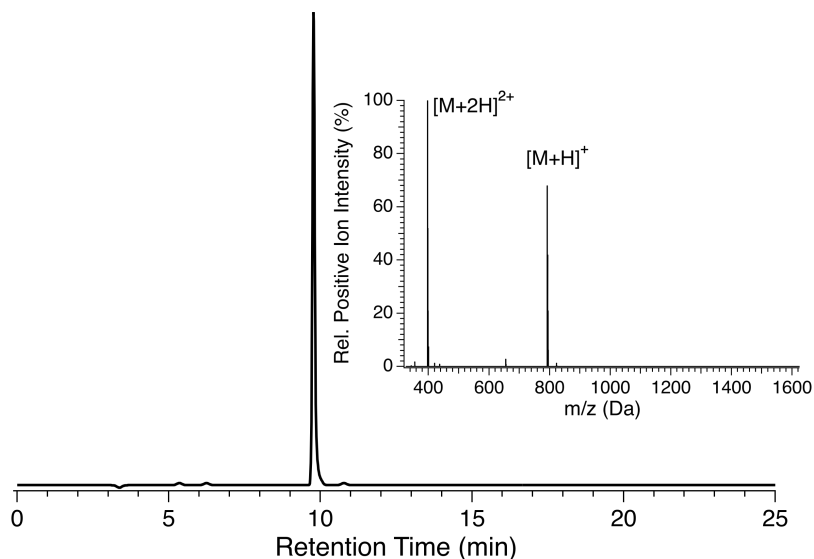

**Figure S2.** HPLC (left) and positive ion-mode ESI-MS (right) of nh2. LC/MS data were obtained on an Agilent 6230 Electrospray Ionization Time-of-Flight Mass Spectrometer with an Agilent 1260 Infinity II HPLC equipped with a Waters XTerra C-18 analytical column ( $4.6 \times 150$  mm;  $5 \mu\text{m}$ ). A linear gradient of 10 - 65% MeCN in water (0.1% formic acid) over 25 min was used.

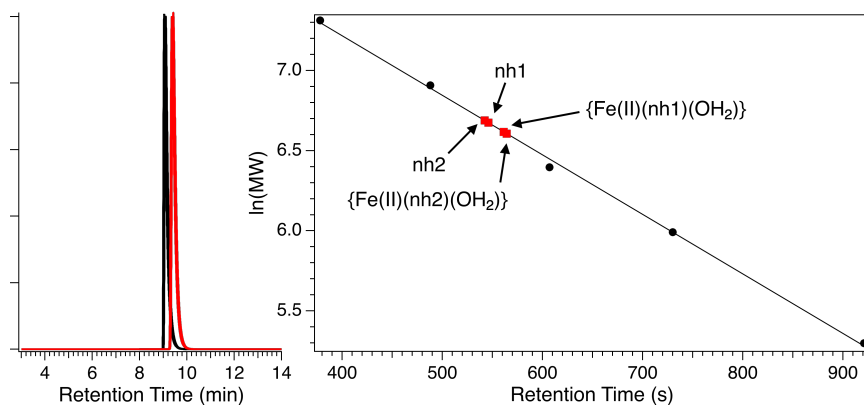

**Figure S3.** Representative GPC results obtained on a Waters DeltaPrep 60 Waters HPLC system equipped with a Protein-Pak GPC column ( $7.8 \times 300$  mm,  $60 \text{ \AA}$  pore size) using an aqueous solution of  $\text{NaHCO}_3$  (sat.) under a positive pressure of  $\text{He}(\text{g})$ . Poly(ethylene glycol) standards were purchased from Waters. Left: GPC chromatograms of nh1, nh2,  $\{\text{Fe}(\text{II})(\text{nh1})(\text{OH}_2)\}$  and  $\{\text{Fe}(\text{II})(\text{nh2})(\text{OH}_2)\}$ . The two peptide are the black traces and the two metallopeptides are the red traces. Right: Calibration curve and individual retention times of poly(ethylene glycol) standards (black line and circles). The red squares are the retention times of nh1, nh2,  $\{\text{Fe}(\text{II})(\text{nh1})(\text{OH}_2)\}$  and  $\{\text{Fe}(\text{II})(\text{nh2})(\text{OH}_2)\}$ . The retention times for nh1, nh2,  $\{\text{Fe}(\text{II})(\text{nh1})(\text{OH}_2)\}$  and  $\{\text{Fe}(\text{II})(\text{nh2})(\text{OH}_2)\}$  indicate they are monomeric in nature and that the metallopeptides have a lower apparent MW. The lower apparent MW by GPC is a result of the peptide backbone wrapping about the  $\text{Fe}(\text{II})$  centre, which yields a more compact structure than the free peptide, and hence a longer retention time.

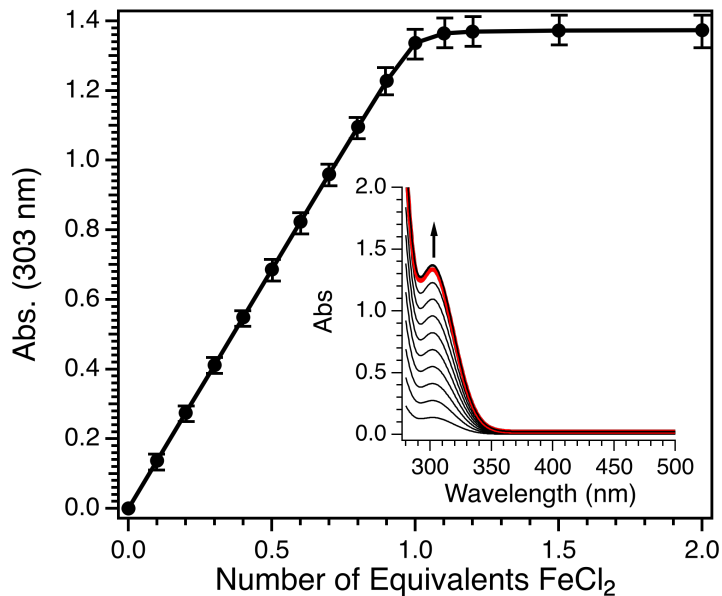

**Figure S4.** Room temperature titration of FeCl<sub>2</sub>(aq) into  $1.0 \times 10^{-3}$  M nh1 solutions at a pH = 8.0 (50 mM NEM buffer solution) showing the increase of the 304 nm CT band upon increasing Fe(II) concentration. The inset shows the individual UV/vis traces. The red trace corresponds to a 1:1 Fe(II):nh1 molar ratio. The standard error for each data point is based on three separate titrations on independently prepared peptide solutions.

peptide solutions of 1 mM or less, yielding titration plots outlined in Figures S1 (Fe<sup>2+</sup> + nh1) and S2 (Fe<sup>2+</sup> + nh2) while monitoring the increase of the intensity of the lower-energy LMCT band at  $\sim 305$  nm. All titrations were performed in triplicate. Based on fitting the titration data Fe(II)  $K_d$  values of  $< 2 \mu\text{M}$  were obtained for both {Fe(II)(nh1)(OH<sub>2</sub>)} and {Fe(II)(nh2)(OH<sub>2</sub>)}. GPC studies of {Fe(II)(nh1)(OH<sub>2</sub>)} and {Fe(II)(nh2)(OH<sub>2</sub>)} (generated by the addition of 1.0 eq of FeCl<sub>2</sub> to nh1/2 solutions at pH = 8.0 (50 mM NEM buffer)) were performed in an anaerobic bag under a continuous Ar(g) purge, and indicate a 1:1 Fe(II):peptide stoichiometry.

All subsequent metallopeptide solutions were made by injecting 1.0 eq of Fe<sup>2+</sup> (from the above 50 mM stock solution) into solutions of nh1 or nh2 at pH = 8.0 (50 mM NEM buffer). Electronic absorption spectra were recorded on an Agilent CARY 5000 UV/Vis-NIR spectrometer and circular dichroism (CD) spectra were recorded on a JASCO J1500 spectropolarimeter (Figure S3). Optical spectra were obtained at room temperature in sealed

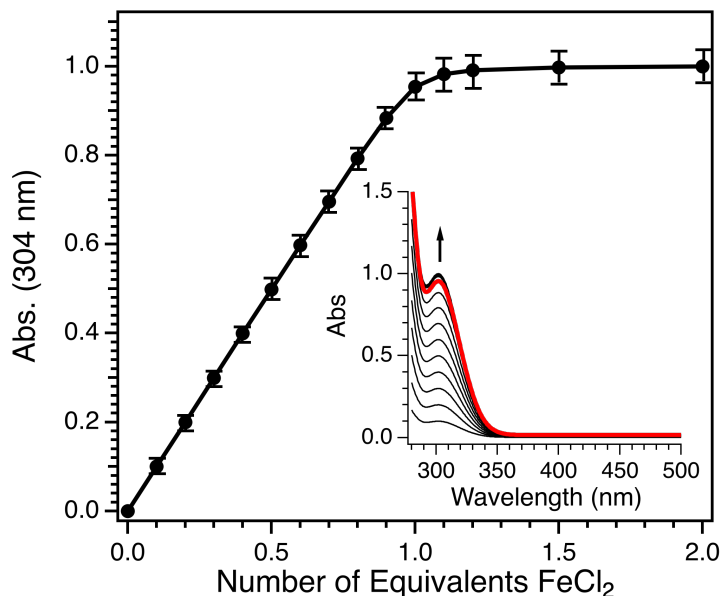

**Figure S5.** Room temperature titration of  $\text{FeCl}_2(\text{aq})$  into  $7.5 \times 10^{-4}$  M  $\text{nh}_2$  solutions at a  $\text{pH} = 8.0$  (50 mM NEM buffer solution) showing the increase of the 303 nm CT band upon increasing  $\text{Fe}(\text{II})$  concentration. The inset shows the individual UV/vis traces. The red trace corresponds to a 1:1  $\text{Fe}(\text{II})$ : $\text{nh}_2$  molar ratio. The standard error for each data point is based on three separate titrations on independently prepared peptide solutions.

air-free 1 cm rectangular cuvettes. CD data represent the summed average of ten individual spectra.

Oxidation reactions were performed by exposing  $\text{pH} 8.0$  (50 mM NEM) solutions of  $\{\text{Fe}(\text{II})(\text{nh}_1)(\text{OH}_2)\}$  or  $\{\text{Fe}(\text{II})(\text{nh}_2)(\text{OH}_2)\}$  to  $\text{O}_2$  or  $^{18}\text{O}_2$  (ICON isotopes). Upon exposure of reduced peptide solutions to dioxygen an immediate color change from a colorless to rust-colored orange solution was noted followed by the formation of a brownish-red colored solid. The oxidation reactions were then filtered through nylon membranes ( $0.45 \mu\text{m}$  pore size) resulting in clear colorless solutions which were analyzed by LC/MS on an Agilent 6230 Electrospray Ionization Time-of-Flight Mass Spectrometer with an Agilent 1260 Infinity II HPLC equipped with a Waters XTerra C-18 analytical column ( $4.6 \times 150 \text{ mm}$ ;  $5 \mu\text{m}$ ). A linear gradient of 10 - 25% MeCN in water (0.1% formic acid) over 25 min was used (Figure 6 of the main manuscript and Figures S14 – S17). MALDI-TOF mass spectrometry of the solids generated in the above reactions (Figures S20 and S21) were performed using CHCA

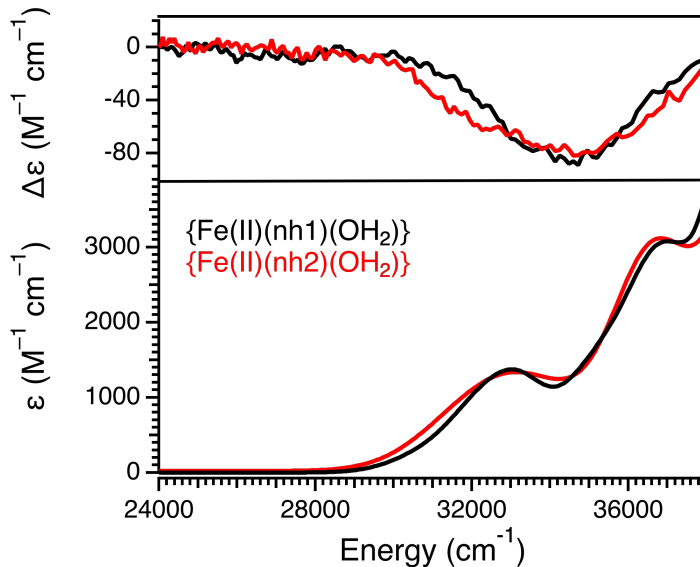

**Figure S6.** Electronic absorption (bottom) and CD spectra (top) recorded for  $\{\text{Fe(II)(nh1)(OH}_2\}\}$  (black) and  $\{\text{Fe(II)(nh2)(OH}_2\}\}$  (red) at room temperature (pH 8.0 50 mM NEM buffer).

as the matrix material on a Bruker MicroFlex MALDI-TOF in positive ion mode.

**Iron K-edge X-ray Absorption Spectroscopy.** Reduced metallopeptide solutions were prepared in a COY chamber at a concentration of 2.0 mM in a 4:1 mixture of 50 mM NEM buffer pH 8.0:glycerol, injected into lucite sample holders with windows of Kapton tape and quickly frozen in liquid nitrogen. Data were collected at the Stanford Synchrotron Radiation Laboratory (Menlo Park, CA) on beamline 7-3 at 12(2) K with temperatures maintained using an Oxford liquid He cryostat. Light was monochromatized using a Si(220) double crystal monochromator, which was detuned 50% for harmonic rejection. Spectra were obtained in fluorescence mode using a 30-element solid-state Ge detector (Canberra) with an manganese filter placed between the sample and detector. Spectra were calibrated against the first inflection point of Fe-foil (7111.2 eV), which was simultaneously recorded with the samples. Data were obtained in 10 eV steps in the pre-edge region (6912 – 7092 eV, 1 s integration time), 0.3 eV steps in the pre-edge region (7092 – 7135 eV, 2 s integration time), 1.0 eV steps in the edge region (7135 – 7155 eV, 2 s integration time), 2.0 eV steps in the near edge region (7155 – 7455 eV, 3 s integration time), and 0.05 k steps in the far edge region

(7455 eV – 15.0 Å<sup>-1</sup>, 3 s integration time). Although no photodamage was noted from scan to scan, the 1 × 5 mm beam spot was moved after every 2 scans. Total fluorescence counts were maintained under 30 kHz, and a deadtime correction yielded no appreciable change to the data. The reported spectra represent the averaged spectra from 8 individual data sets. Prior to data averaging each spectrum and detector channel was individually inspected for data quality. Although data were recorded to 15 Å<sup>-1</sup>, the data were analyzed only to 14.3 Å<sup>-1</sup> owing to noise at high  $k$ . Data were subsequently processed and analyzed as previously reported using EXAFS123 and FEFF 9.4 as previously reported<sup>2</sup> except for further processes of the pre-edge features (see below). Errors to the EXAFS models are reported as  $\epsilon^2$  values.<sup>3</sup>

The individual transitions comprising the pre-edge peaks were extracted as follows. Following removal of the edge jump the pre-edge was modeled as three pseudo-Voigt line shapes (1:1 mixture of Gaussian:Lorentzian functions). Owing to the fact that multiple minima could be located if peak intensity, energy and line-widths were permitted to freely float the fwhm for all three peaks were restrained to 1.1 eV and the second highest energy transition was restrained to have an intensity greater than 0 but less than the highest energy transition. Extraction of excitation energies led to the  $10Dq$  and  $B$  values for {Fe(II)(nh1)(OH<sub>2</sub>)} and {Fe(II)(nh2)(OH<sub>2</sub>)} listed in Table S4.

**Iron L-edge X-ray Absorption Spectroscopy.** Thin films of {Fe(II)(nh1)(OH<sub>2</sub>)} and {Fe(II)(nh2)(OH<sub>2</sub>)} were prepared by the slow evaporation of a 20 μL volume of metalloprotein solution (~ 0.5 mM) placed on a 7.0 × 5.0 mm silicon wafers (SPI Supplies) under an Ar atmosphere. Data were collected at the National Synchrotron Light Source II (Upton, NY) on beamline 23-ID-2 in as total fluorescence yield data. Data were collected in 0.4 eV steps prior to the Fe L<sub>3</sub> edge (660 - 700 eV) 0.1 steps in the L<sub>3</sub> and L<sub>2</sub> edge region (700 - 730 eV) and the 0.4 eV steps past the L<sub>2</sub> edge region (730 - 850 eV). Data were collected on multiple metalloprotein thin films and represent the average of 10 spectra. Following data averaging a baseline was fit to the data by modeling the background as a polynomial function before the L<sub>3</sub> edge and then modeling the edge jumps as:

**Table S1.** Reported fit and alternative models for the EXAFS data obtained for {Fe(II)(nh1)(OH<sub>2</sub>)}.  $E_o = 7122.6$  eV for all fits.

|                                | <b>N<sub>4</sub>O<sub>5</sub>Im<sub>2</sub>(a)</b> | <b>N<sub>4</sub>O<sub>5</sub>Im<sub>2</sub>(b)</b> | <b>N<sub>4</sub>OS</b> | <b>N<sub>5</sub>SIm<sub>2</sub><sup>a</sup></b> | <b>N<sub>5</sub>S</b> | <b>N<sub>6</sub></b> |
|--------------------------------|----------------------------------------------------|----------------------------------------------------|------------------------|-------------------------------------------------|-----------------------|----------------------|
| <u>Fe-S Shell</u>              |                                                    |                                                    |                        |                                                 |                       |                      |
| $n$                            | 1                                                  | 1.0(8)                                             | 1                      | 1                                               | 1                     | –                    |
| $r$ (Å)                        | 2.391(15)                                          | 2.39(7)                                            | 2.390(7)               | 2.396(4)                                        | 2.385(4)              |                      |
| $\sigma^2$ (Å <sup>2</sup> )   | 0.0013(3)                                          | 0.0014(13)                                         | 0.0021(6)              | 0.0013(4)                                       | 0.0033(4)             |                      |
| <u>Fe-N Shell</u>              |                                                    |                                                    |                        |                                                 |                       |                      |
| $n$                            | 4                                                  | 4.0(6)                                             | 4                      | 5                                               | 5                     | 6                    |
| $r$ (Å)                        | 2.165(3)                                           | 2.165(10)                                          | 2.165(5)               | 2.169(4)                                        | 2.167(4)              | 2.165(2)             |
| $\sigma^2$ (Å <sup>2</sup> )   | 0.0033(6)                                          | 0.0033(14)                                         | 0.0049(13)             | 0.0049(6)                                       | 0.0041(6)             | 0.0059(3)            |
| <u>Fe-O Shell</u>              |                                                    |                                                    |                        |                                                 |                       |                      |
| $n$                            | 1                                                  | 1.0(6)                                             | 1                      | –                                               | –                     | –                    |
| $r$ (Å)                        | 2.292(4)                                           | 2.202(5)                                           | 2.29(2)                |                                                 |                       |                      |
| $\sigma^2$ (Å <sup>2</sup> )   | 0.0020(5)                                          | 0.0020(13)                                         | 0.0020(11)             |                                                 |                       |                      |
| <u>Fe-Im Shell<sup>b</sup></u> |                                                    |                                                    |                        |                                                 |                       |                      |
| $n$                            | 2                                                  | 2.6(8)                                             | –                      | 2                                               | –                     | –                    |
| $r$ (Å)                        | 2.1650                                             | 2.1650                                             |                        | 2.1692                                          |                       |                      |
| $\sigma^2$ (Å <sup>2</sup> )   | 0.006(4)                                           | 0.006(3)                                           |                        | 0.002(2)                                        |                       |                      |
| $\theta$ (°)                   | 18.4(80)                                           | 18.4(50)                                           |                        | 14(2)                                           |                       |                      |
| $r'$ (Å)                       | 0.0(4)                                             | 0.0(10)                                            |                        | 0.7(45)                                         |                       |                      |
| $\epsilon^2$                   | 0.57                                               | 0.54                                               | 0.66                   | 0.58                                            | 0.66                  | 1.00                 |

<sup>a</sup> **Reported fit.** Although  $\epsilon^2$  is slightly higher for this fit than the N<sub>4</sub>SOIm<sub>2</sub> fit we report this model as it is both statistically valid ( $\epsilon^2$  is within 1.0 of the lowest achievable value) and the separation of the N and O shells are not justified at this resolution of data ( $\Delta r > 0.15$  Å based on  $\Delta k = 12.1$  Å<sup>-1</sup>).

<sup>b</sup>This shell only included contributions to the imidazole outersphere single and multiple scattering pathways. The innersphere pathway was included with the Fe-N single scattering pathways. The distance variable refers to the innersphere Fe-N distance and was restrained to the value obtained from the Fe-N single scattering pathway. We note that the values of  $\theta$  and  $r'$ , which describe the deviation of the Fe atom out-of-plane with respect to the imidazole ring ( $r'$ ) and the angle of inflection of the iron atom out-of-plane with respect to the imidazole ring ( $\theta$ ), has no real physical meaning when the number of imidazoles considered is greater than one.

**Table S2.** Reported fit and alternative models for the EXAFS data obtained for {Fe(II)(nh<sub>2</sub>)(OH<sub>2</sub>)}.  $E_o = 7122.9$  eV for all fits.

|                                | <b>N<sub>4</sub>O<sub>5</sub>Im<sub>2</sub>(a)</b> | <b>N<sub>4</sub>O<sub>5</sub>Im<sub>2</sub>(b)</b> | <b>N<sub>4</sub>O<sub>5</sub></b> | <b>N<sub>5</sub>SIm<sub>2</sub><sup>a</sup></b> | <b>N<sub>5</sub>S</b> | <b>N<sub>6</sub></b> |
|--------------------------------|----------------------------------------------------|----------------------------------------------------|-----------------------------------|-------------------------------------------------|-----------------------|----------------------|
| <u>Fe-S Shell</u>              |                                                    |                                                    |                                   |                                                 |                       |                      |
| $n$                            | 1                                                  | 0.93(11)                                           | 1                                 | 1                                               | 1                     | –                    |
| $r$ (Å)                        | 2.39(2)                                            | 2.40(5)                                            | 2.38(2)                           | 2.338(10)                                       | 2.324(13)             |                      |
| $\sigma^2$ (Å <sup>2</sup> )   | 0.0020(4)                                          | 0.004(6)                                           | 0.0016(3)                         | 0.0029(12)                                      | 0.0011(2)             |                      |
| <u>Fe-N Shell</u>              |                                                    |                                                    |                                   |                                                 |                       |                      |
| $n$                            | 4                                                  | 5.6(6)                                             | 4                                 | 5                                               | 5                     | 6                    |
| $r$ (Å)                        | 2.166(3)                                           | 2.168(10)                                          | 2.165(3)                          | 2.168(3)                                        | 2.163(3)              | 2.161(2)             |
| $\sigma^2$ (Å <sup>2</sup> )   | 0.0017(3)                                          | 0.0042(15)                                         | 0.0021(4)                         | 0.0044(3)                                       | 0.0056(3)             | 0.0057(2)            |
| <u>Fe-O Shell</u>              |                                                    |                                                    |                                   |                                                 |                       |                      |
| $n$                            | 1                                                  | 0.8(2)                                             | 1                                 | –                                               | –                     | –                    |
| $r$ (Å)                        | 2.301(3)                                           | 2.308(15)                                          | 2.309(4)                          |                                                 |                       |                      |
| $\sigma^2$ (Å <sup>2</sup> )   | 0.0028(3)                                          | 0.007(3)                                           | 0.0024(4)                         |                                                 |                       |                      |
| <u>Fe-Im Shell<sup>a</sup></u> |                                                    |                                                    |                                   |                                                 |                       |                      |
| $n$                            | 2                                                  | 1.8(6)                                             | –                                 | 2                                               | –                     | –                    |
| $r$ (Å)                        | 2.1656                                             | 2.1680                                             |                                   | 2.1677                                          |                       |                      |
| $\sigma^2$ (Å <sup>2</sup> )   | 0.007(3)                                           | 0.004(6)                                           |                                   | 0.0010(6)                                       |                       |                      |
| $\theta$ (°)                   | 17.6(3)                                            | 18.7(3)                                            |                                   | 18(3)                                           |                       |                      |
| $r'$ (Å)                       | 0(6)                                               | 0.4(12)                                            |                                   | 0(2)                                            |                       |                      |
| $\epsilon^2$                   | 0.61                                               | 0.56                                               | 0.77                              | 0.68                                            | 0.75                  | 1.02                 |

<sup>a</sup> **Reported fit.** Although  $\epsilon^2$  is slightly higher for this fit than the N<sub>4</sub>SOIm<sub>2</sub> fit we report this model as it is both statistically valid ( $\epsilon^2$  is within 1.0 of the lowest achievable value) and the separation of the N and O shells are not justified at this resolution of data ( $\Delta r > 0.15$  Å based on  $\Delta k = 12.1$  Å<sup>-1</sup>).

<sup>b</sup>This shell only included contributions to the imidazole outersphere single and multiple scattering pathways. The innersphere pathway was included with the Fe-N single scattering pathways. The distance variable refers to the innersphere Fe-N distance and was restrained to the value obtained from the Fe-N single scattering pathway. We note that the values of  $\theta$  and  $r'$ , which describe the deviation of the Fe atom out-of-plane with respect to the imidazole ring ( $r'$ ) and the angle of inflection of the iron atom out-of-plane with respect to the imidazole ring ( $\theta$ ), has no real physical meaning when the number of imidazoles considered is greater than one.

$$I_n = H_n \left( \frac{1}{2} + \pi^{-1} \arctan \left[ \frac{E - P_n}{0.5\Gamma} \right] \right) \quad (1)$$

where  $n = 2$  or  $3$ ,  $H_n$  is the height of the  $L_n$  edge,  $P_n$  is the energy of the  $L_n$  edge and  $\Gamma$  is the width of the jump. Data were subsequently modeled within a ligand-field multiplets framework using the software package *CT4XAS*.<sup>4</sup> Data were modeled using an  $O_h$  ligand field without the need for included charge-transfer effects (Figure S4). For these calculations the appropriate Slater integrals were reduced to 90% of their atomic values for  $\{\text{Fe(II)(nh1)(OH}_2)\}$  and 80% of their atomic values for  $\{\text{Fe(II)(nh2)(OH}_2)\}$ , while core and valence spin orbit coupling values were reduced to 90% of their atomic values for both complexes. The value for  $10D_q$  used in the crystal field model were 0.94 eV for  $\{\text{Fe(II)(nh1)(OH}_2)\}$  and 0.99 eV for  $\{\text{Fe(II)(nh2)(OH}_2)\}$ , which are in-line with the AILFT values derived below. Spectral line shapes were simulated by application of pseudo-Voigt functions to each transition and summing the individual transitions (line broadening: Gaussian *fwhm* = 0.20 eV; Lorentzian *fwhm* = 0.20 eV below 715 eV and 0.50 eV above 715 eV).

**Sulfur K-edge X-ray Absorption Spectroscopy.** Reduced metalloprotein solutions were prepared in a COY chamber at a concentration of 2.0 mM in a 4:1 mixture of 50 mM NEM buffer pH 8.0:glycerol, injected into aluminum sample holders with windows made from 2.5  $\mu\text{m}$  thick Mylar film and quickly frozen in liquid nitrogen. Sample oxidation was achieved by allowing the samples to warm to room temperature in air and then immediately refreezing the sample in liquid nitrogen. Data were collected at the Stanford Synchrotron Radiation Laboratory (Menlo Park, CA) on beamline 4-3 in a He(g) atmosphere. Samples were maintained at  $\sim 100$  K using a cold He(g) cryostream positioned directly over the sample. Light was monochromatized using a Si(111) double crystal monochromator, which was detuned 75% for harmonic rejection, and data were collected in fluorescence mode using a 4-element Si-drift detector. The energy was calibrated to the first inflection point of a sample of  $\text{Na}_2\text{S}_2\text{O}_3$  (2472.02 eV) collected before and after sample data collection; no drift in energy was noted during data collection. Spectra were obtained in 1.0 eV steps in the

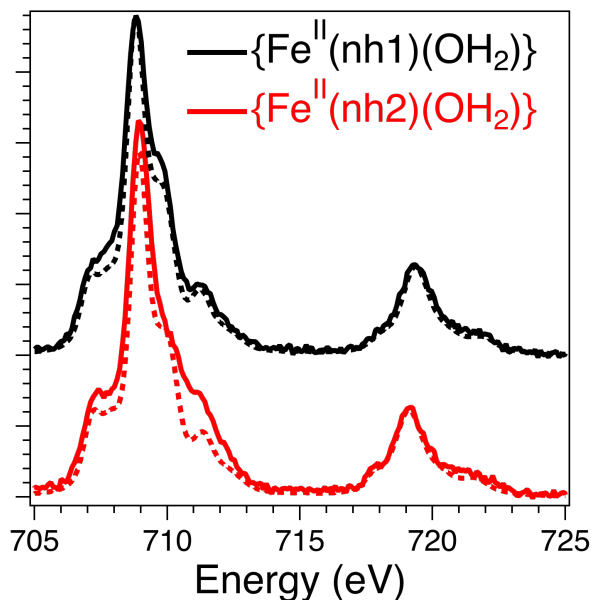

**Figure S7.** Fe L-edge XAS spectra following baseline subtraction for  $\{\text{Fe(II)(nh1)(OH}_2\}$  (black spectrum) and  $\{\text{Fe(II)(nh2)(OH}_2\}$  (red spectrum). The experimental data are depicted as the solid spectra and the best fits to the experimental data are depicted as the dashed spectra.

pre-edge region (2365 - 2465 eV; 1 s integration time) 0.1 eV steps in the edge region (2465 - 2485 eV; 2 s integration time) and 2.0 eV steps in the post edge region (2485 - 2700 eV; 2 s integration time). The reported data represent the average of five scans. Data were subsequently worked-up and analyzed as previously reported using  $[\text{Et}_4\text{N}](\text{FeCl}_4)$  as an Fe-S covalency standard.<sup>5</sup>

**Electronic Structure Calculations.** Electronic structure calculation were performed using the electronic software suite *ORCA* v. 5.0.3 or 6.0.1.<sup>6</sup> All calculations employed the def2-tzvp basis set on all atoms and “tightscf” convergence criteria. Geometry optimizations employed the BP86 density functional followed by the PBE0 hybrid density functional, the atom-pairwise dispersion correction with Becke-Johnson damping (D3), and the conductor-like polarization model with parameters appropriate for water (cpcm(water)). Starting atomic coordinates for these geometry optimizations were constructed from the crystallographic coordinates for the nickel center and the first six residues (HCDPLC) from the *Streptomyces seoulensis* NiSOD protein structure (PDB ID = 1Q0D) with the following

modifications: a) H-atoms were placed in idealized positions, b) the Ni(III) center was replaced with an Fe(II) center, c) the side chain of D3 was replaced with a hydrogen atom, d) either C6 was changed to H (nh1 computational mimic) or C2 was changed to H (nh2 computational mimic) , and e) a water was placed *trans* to the coordinate imidazole ligand from H1. Oxidized Fe(III) models were generated in an identical manner except that the water molecule was replaced with an  $O_2^-$  ligand. For the oxidized Fe(III)superoxo-bound models the broken symmetry approximation was used to account for spin-coupling between the unpaired spins on the superoxo-ligand and the iron-center. Magnetic exchange constants,  $J$ , were calculated using the formalism of Soda and co-workers.<sup>7</sup> Single point calculations were performed on these geometry optimized structures using the same methods as above using the PBE0 hybrid density functional. Orbital populations are reported as Löwdin populations. Isosurface plots were generated using the *UCSF Chimera* visualization software package.<sup>8</sup>

**Table S3.** Calculated Fe-ligand bond lengths (Å) from the PBE0/def2-tzvp/D3/CPCM(water) geometry optimization calculations.

|                    | Fe(II)nh1(OH <sub>2</sub> ) | Fe(II)nh2(OH <sub>2</sub> ) | Fe(III)nh1(O <sub>2</sub> <sup>-</sup> ) | Fe(III)nh2(O <sub>2</sub> <sup>-</sup> ) |
|--------------------|-----------------------------|-----------------------------|------------------------------------------|------------------------------------------|
| Fe-S               | 2.366                       | 2.379                       | 2.248                                    | 2.239                                    |
| Fe-N (axial)       | 2.150                       | 2.113                       | 2.042                                    | 2.042                                    |
| Fe-N (amine)       | 2.255                       | 2.230                       | 2.016                                    | 2.006                                    |
| Fe-N (amide)       | 2.104                       | 2.131                       | 1.916                                    | 1.968                                    |
| Fe-N (imidazole)   | 2.179                       | 2.139                       | 2.071                                    | 1.959                                    |
| Fe-OH <sub>2</sub> | 2.335                       | 2.370                       | —                                        | —                                        |
| Fe-ceO2-           | —                           | —                           | 1.827                                    | 1.854                                    |

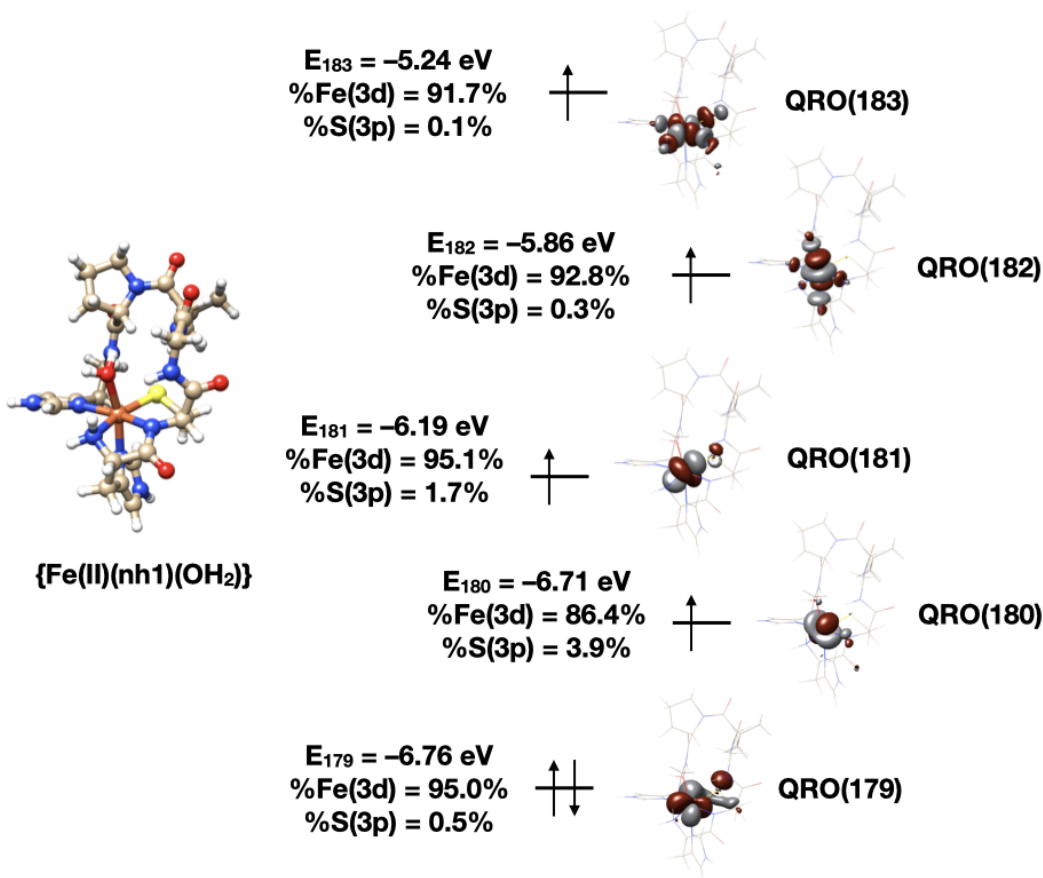

**Figure S8.** Left: Ball and stick representation of the geometry optimized structure of  $\{\text{Fe(II)(nh1)(OH}_2\}$  (PBE0/def2-tzvp/D3/cpcm(water)). Right: Isosurface plots of the quasirestricted orbitals (QROs; 0.03 a.u.) corresponding to the nominal 3d-orbitals for  $\{\text{Fe(II)(nh1)(OH}_2\}$  along with calculated QRO energies and Fe(3d) and S(3p) AO compositions to the QROs (Löwdin populations).

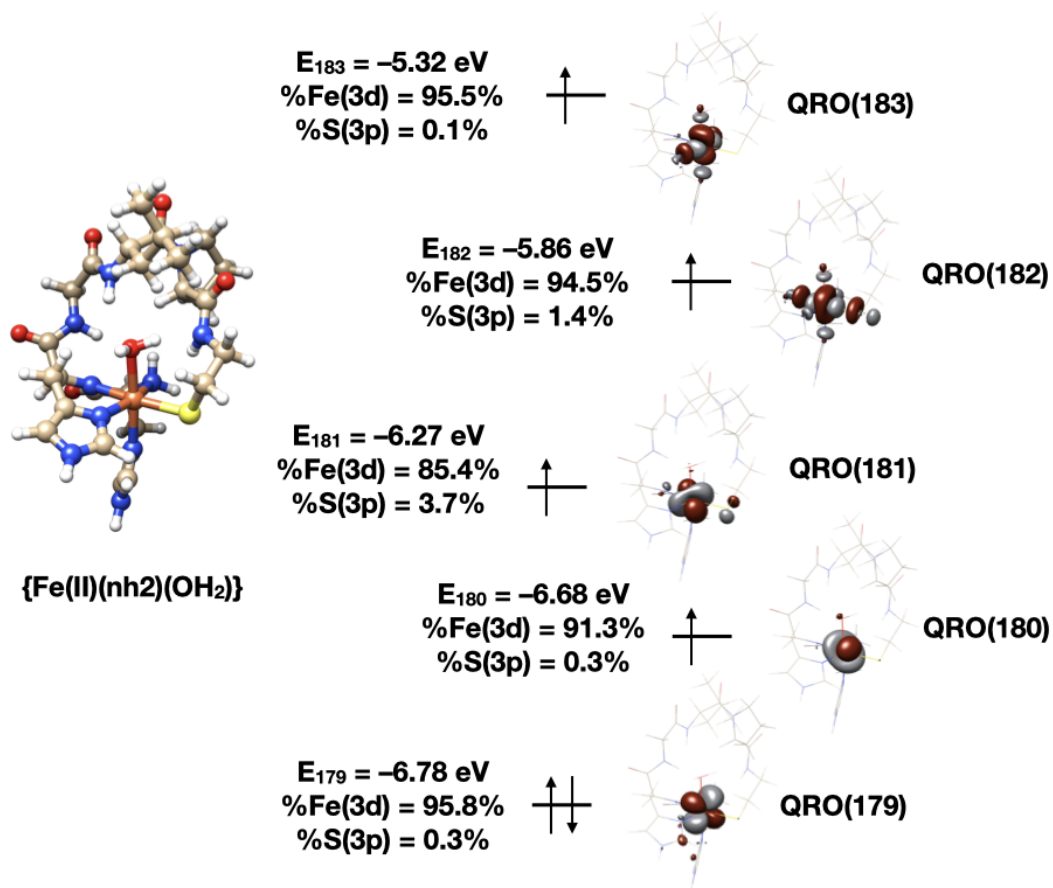

**Figure S9.** Left: Ball and stick representation of the geometry optimized structure of  $\{\text{Fe(II)}(\text{nh}_2)(\text{OH}_2)\}$  (PBE0/def2-tzvp/D3/cpcm(water)). Right: QROs (0.03 a.u.) corresponding to the nominal 3d-orbitals for  $\{\text{Fe(II)}(\text{nh}_2)(\text{OH}_2)\}$  along with calculated QRO energies and Fe(3d) and S(3p) AO compositions to the QROs (Löwdin populations).

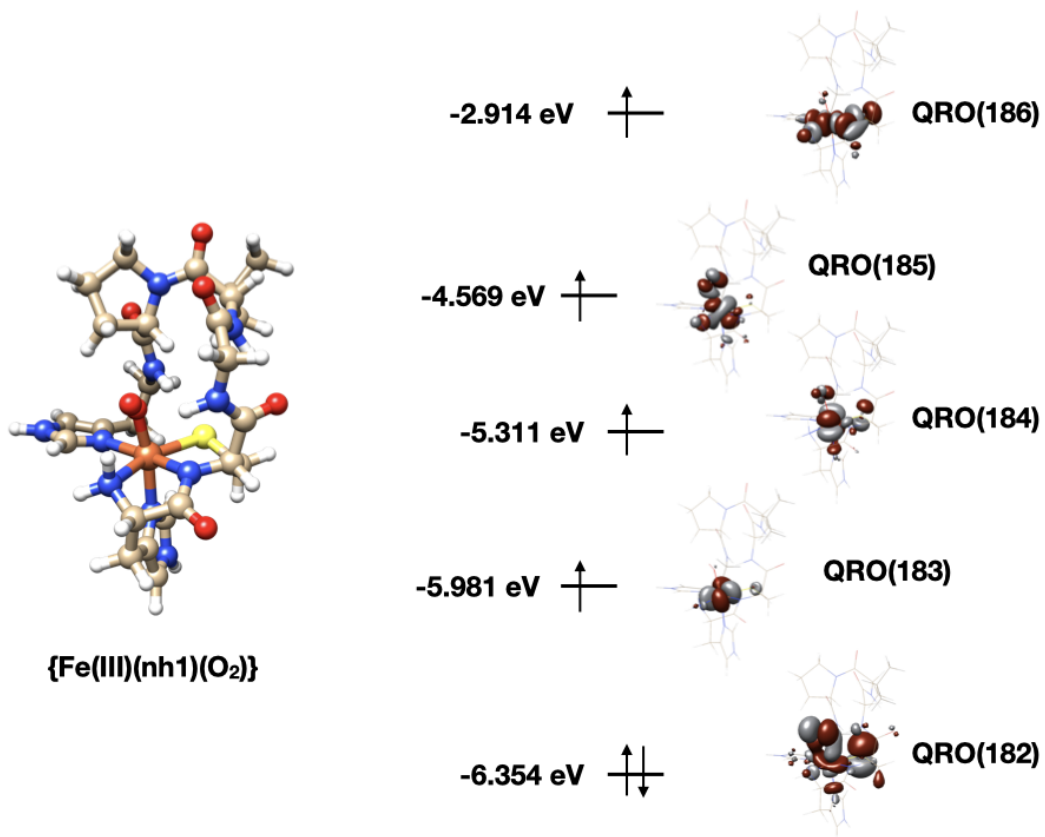

**Figure S10.** Left: Ball and stick representation of the geometry optimized structure of  $\{\text{Fe(III)(nh1)(O}_2\}$  (PBE0/def2-tzvp/D3/cpcm(water)). Right: QROs (0.03 a.u.) corresponding to the nominal 3d-orbitals for  $\{\text{Fe(III)(nh1)(O}_2\}$ .

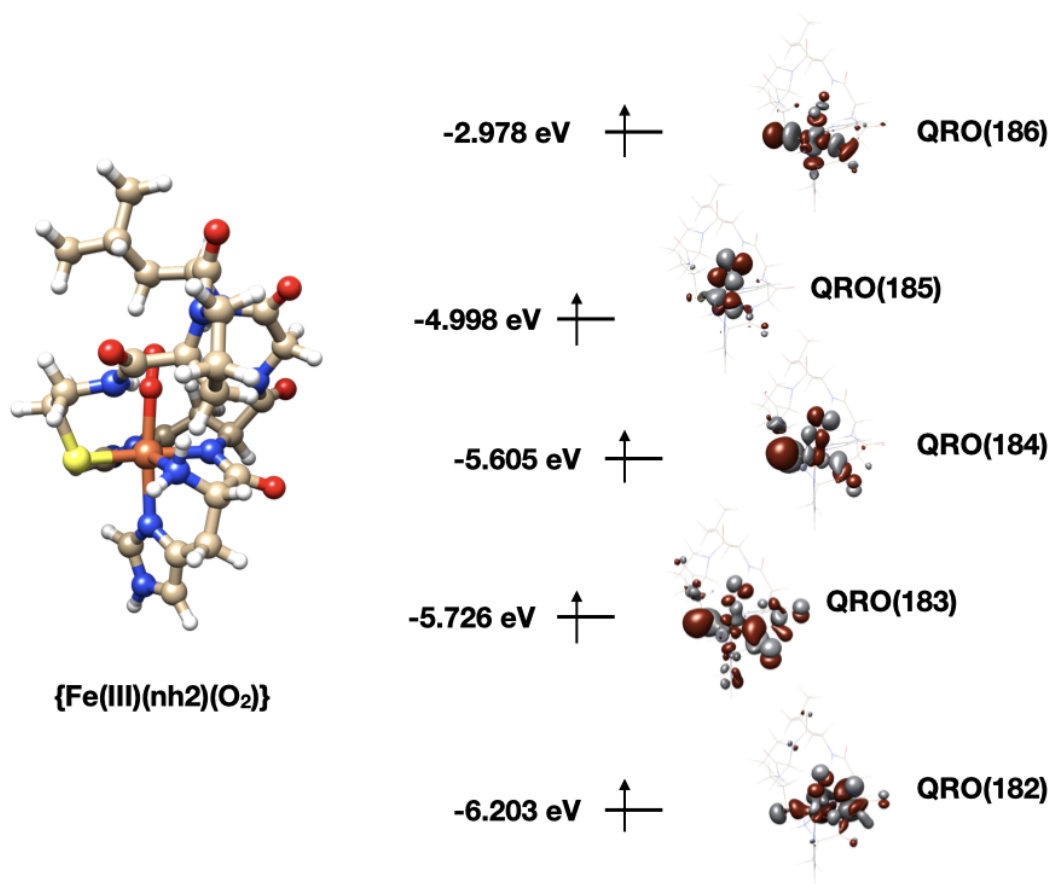

**Figure S11.** Left: Ball and stick representation of the geometry optimized structure of  $\{\text{Fe(III)(nh}_2\text{)(O}_2\}\}$  (PBE0/def2-tzvp/D3/cpcm(water)). Right: QROs (0.03 a.u.) corresponding to the nominal 3d-orbitals for  $\{\text{Fe(III)(nh}_2\text{)(O}_2\}\}$ .

# ***Ab Initio* Ligand Field Theory and Subsequent Fe K-edge 1s→3d Multiplet Analysis**

The reproduction of the pre-edge feature found in the Fe K-edge XANES spectra of {Fe(II)(nh-1)(OH<sub>2</sub>)} and {Fe(II)(nh<sub>2</sub>)(OH<sub>2</sub>)} utilized a Multiplets analysis with input parameters obtained from *ab initio* ligand field theory (AILFT) calculations of minimized metallopeptide models. All heavy atoms except the iron-center, oxygen from the coordinated water, and atoms from the side chains and backbone chelate were deleted from the full length peptide mimics. The appropriate hydrogen atoms were then added to the model, whose positions were then optimized at the PBE0/def2-tzvp/D3/cpcm(water) level of theory (all heavy atoms coordinates were restrained) resulting in the minimized metallopeptide models outlined in Figures S9 and S11.

All AILFT calculations were performed on these models using the SC-NEVPT2 method with def2-tzvp basis set and def2-tzvp/c auxiliary basis set. For the 3d<sup>6</sup> Fe(II) ground state excitations among the purified d-orbitals on the quintet, triplet and singlet surfaces were examined by fully saturating the acceptor space (five roots on the quintet surface, 45 roots on the triplet surface, and 50 roots on the singlet surface). Solomon and co-workers have previously demonstrated that the final states for 1s→3d transitions can be modeled in such a manner as the increase in  $Z_{\text{eff}}$  following generation of a M(1s) hole is effectively mimicked as a Z+1 “excited state.” Therefore, the excited states were modeled a 3d<sup>7</sup> Co(II) with the iron center replaced by cobalt in the above models (all atom positions restrained to their Fe minimized positions). We examined excitations on the quartet and doublet surfaces with the acceptor spaces fully saturated (ten roots on the quartet surface and forty roots on the doublet surface). The results from these ground and excited state calculations are reported in Table S3. In addition, the K-edge transitions were also simulated using 2-shell AILFT (1s3d shells) examining all quintet, triplet and singlet surfaces transitions.

The d<sup>7</sup> Tanabe-Sugano matrices were also used to estimate the energies and intensities of

the final state transitions using the calculated values for  $10D_q$ , B and C were taken from the Co(II) AILFT calculations resulting in the values displayed in Table S4. Pre-edge peaks were then simulated by applying a pseudo-Voigt line shape (50/50 Gaussian/Lorentzian shape) to each transition with a 1.4 eV peak-width and summing the individual peaks (Figure S10/12). A comparison between the simulated pre-edge derived from  $O$ -symmetry and the 2-shell AILFT calculated pre-edge features are provided.

**Table S4.** AILFT results for the minimized metallopeptide computational mimics. All energies are given in eV. Also provided are  $10D_q$  and  $B$  values obtained from fitting the pre-edge peaks from the Fe K-edge XAS data.

|           | {Fe(II)(nh1)(OH <sub>2</sub> )} | {Co(II)(nh1)(OH <sub>2</sub> )} | {Fe(II)(nh2)(OH <sub>2</sub> )} | {Co(II)(nh2)(OH <sub>2</sub> )} |
|-----------|---------------------------------|---------------------------------|---------------------------------|---------------------------------|
| $E(3d_1)$ | 0.000                           | 0.000                           | 0.000                           | 0.000                           |
| $E(3d_2)$ | 0.092                           | 0.087                           | 0.114                           | 0.118                           |
| $E(3d_3)$ | 0.132                           | 0.127                           | 0.232                           | 0.229                           |
| $E(3d_4)$ | 0.873                           | 0.826                           | 0.884                           | 0.822                           |
| $E(3d_5)$ | 1.248                           | 1.191                           | 1.336                           | 1.278                           |
| $10D_q^a$ | 0.986 (0.99)                    | 0.937                           | 0.995 (0.94)                    | 0.934                           |
| $B^a$     | 0.121 (0.12)                    | 0.128                           | 0.121 (0.12)                    | 0.130                           |
| C/B       | 3.708                           | 3.829                           | 3.726                           | 3.793                           |

<sup>a</sup> Experimentally derived values are in the parentheses.

**Table S5.** Calculated energies, populations and intensities of the Fe K-edge transitions from a Tanabe-Sugano analysis. The  $^4A_1$  transitions have been omitted from this analysis since they result from double excitations, and would thus have no appreciable contribution towards the pre-edge feature.

| Final State            | {Fe(II)(nh1)(OH <sub>2</sub> )}             | {Fe(II)(nh2)(OH <sub>2</sub> )}             |
|------------------------|---------------------------------------------|---------------------------------------------|
| $\underline{^4T_1(a)}$ |                                             |                                             |
| Hole Character         | $0.097 t_2^2e\rangle + 0.903 t_2e^2\rangle$ | $0.098 t_2^2e\rangle + 0.902 t_2e^2\rangle$ |
| Relative Energy (eV)   | 0.0                                         | 0.0                                         |
| Relative Intensity     | 1.903                                       | 1.902                                       |
| $\underline{^4T_2}$    |                                             |                                             |
| Hole Character         | $ t_2^2e\rangle$                            | $ t_2^2e\rangle$                            |
| Relative Energy (eV)   | 0.805                                       | 0.802                                       |
| Relative Intensity     | 1.000                                       | 1.000                                       |
| $\underline{^4T_1(b)}$ |                                             |                                             |
| Hole Character         | $0.903 t_2^2e\rangle + 0.097 t_2e^2\rangle$ | $0.902 t_2^2e\rangle + 0.098 t_2e^2\rangle$ |
| Relative Energy (eV)   | 2.593                                       | 2.620                                       |
| Relative Intensity     | 1.097                                       | 1.086                                       |

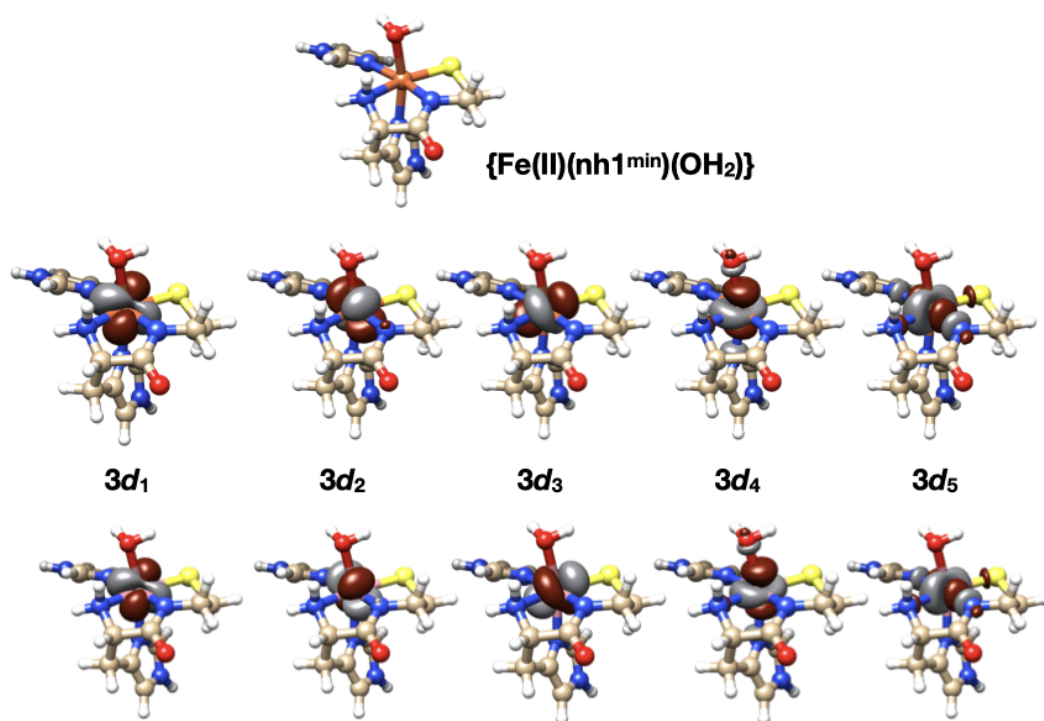

**Figure S12.** Top: Ball and stick figure of the minimized computational model of  $\{\text{Fe(II)(nh1)}(\text{OH}_2)\}$  used in the AILFT calculation. Middle: Isosurface plots (0.03 a.u.) of the MOs corresponding to the purified Fe(3d) orbitals outlined in Table SX. Bottom: Isosurface plots (0.03 a.u.) of the MOs corresponding to the purified Co(3d) orbitals outlined in Table SX

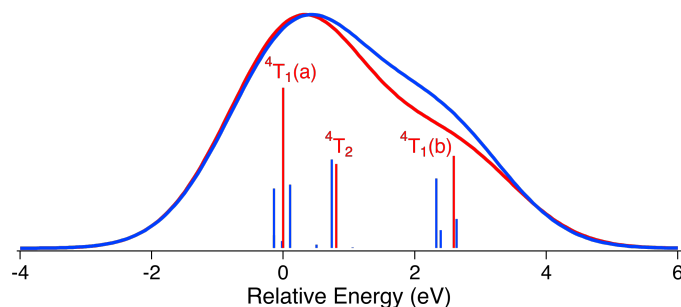

**Figure S13.** Simulated pre-edge features derived from 2-shell AILFT calculations of the minimized computational model of  $\{\text{Fe(II)(nh1)}(\text{OH}_2)\}$  (blue) vs solutions to the  $d^7$  Tanabe-Sugano matrices using crystal-field input parameters derived from the 1-shell AILFT calculations of  $\{\text{Co(II)(nh1)}(\text{OH}_2)\}$  (red). The red and blue sticks correspond to the individual transitions. A 1.4 eV line width was applied to each transition.

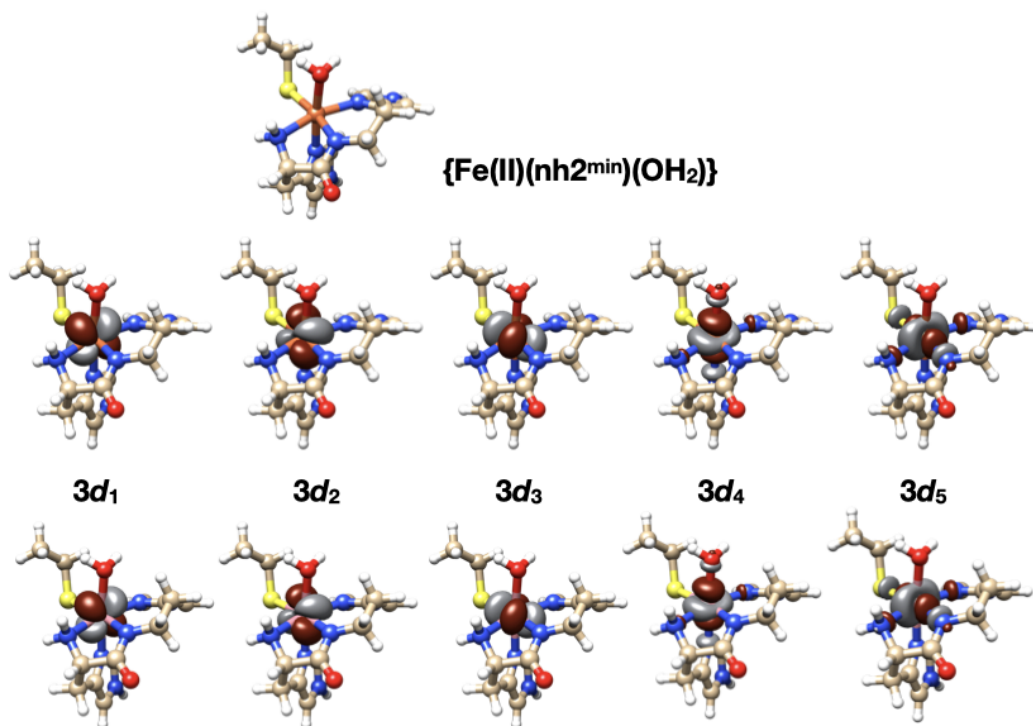

**Figure S14.** Top: Ball and stick figure of the minimized computational model of  $\{\text{Fe(II)(nh}_2\text{)(OH}_2\text{)}\}$  used in the AILFT calculation. Middle: Isosurface plots (0.03 a.u.) of the MOs corresponding to the purified Fe(3d) orbitals outlined in Table SX. Bottom: Isosurface plots (0.03 a.u.) of the MOs corresponding to the purified Co(3d) orbitals outlined in Table SX

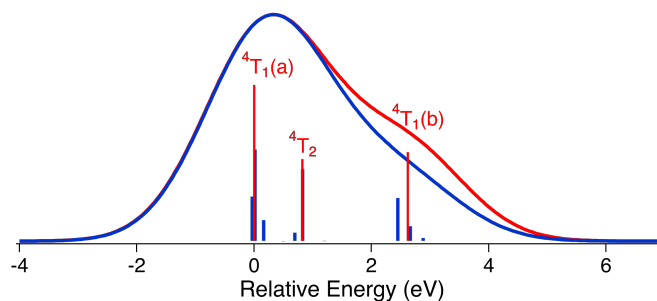

**Figure S15.** Simulated pre-edge features derived from 2-shell AILFT calculations of the minimized computational model of  $\{\text{Fe(II)(nh}_2\text{)(OH}_2\text{)}\}$  (blue) vs solutions to the  $d^7$  Tanabe-Sugano matrices using crystal-field input parameters derived from the 1-shell AILFT calculations of  $\{\text{Co(II)(nh}_2\text{)(OH}_2\text{)}\}$  (red). The red and blue sticks correspond to the individual transitions. A 1.4 eV line width was applied to each transition.

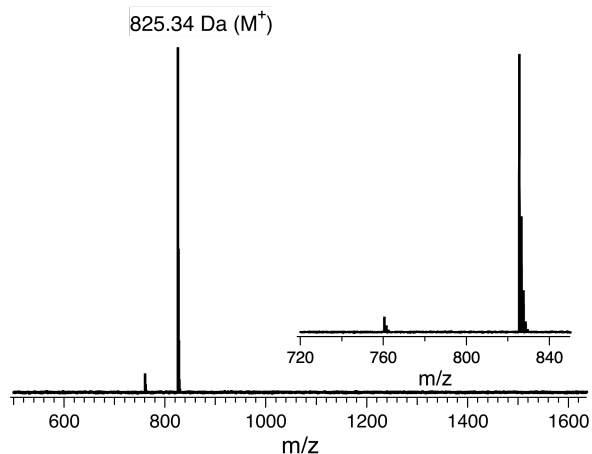

**Figure S16.** ESI-MS (positive ion mode) of peak 1 from the HPLC chromatogram in manuscript Fig. 5 obtained following injection of  $^{16}\text{O}_2(\text{g})$  into solutions of  $\{\text{Fe}(\text{II})(\text{nh1})(\text{OH}_2)\}$  and subsequent filtration. The inset is zoomed in on the  $M^{+1}$  peak ( $M+\text{H}^+$  calc: 825.35484 amu; found: 825.34 amu).

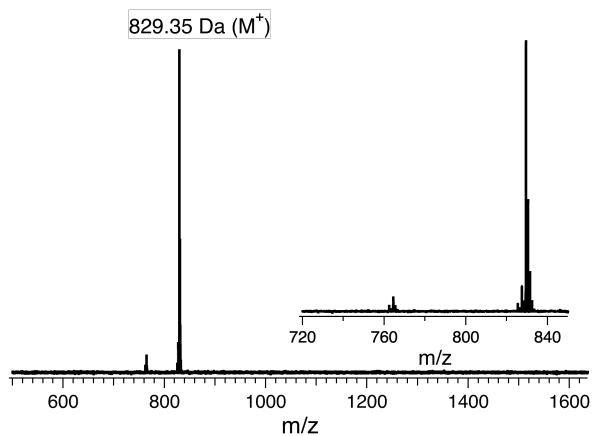

**Figure S17.** ESI-MS (positive ion mode) of peak 1 from the HPLC chromatogram in manuscript Fig. 5 obtained following injection of  $^{18}\text{O}_2(\text{g})$  into solutions of  $\{\text{Fe}(\text{II})(\text{nh1})(\text{OH}_2)\}$  and subsequent filtration. The inset is zoomed in on the  $M^{+1}$  peak ( $M+\text{H}^+$  calc: 829.35689 amu; found: 829.35 amu).

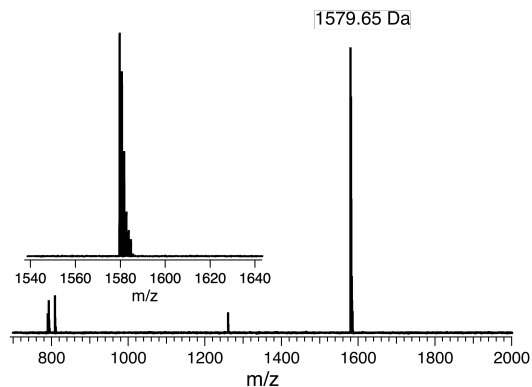

**Figure S18.** ESI-MS (positive ion mode) of peak 2 from the HPLC chromatogram in manuscript Fig. 5 obtained following injection of  $^{16}\text{O}_2(\text{g})$  into solutions of  $\{\text{Fe}(\text{II})(\text{nh1})(\text{OH}_2)\}$  and subsequent filtration. The inset is zoomed in on the  $\text{M}^{+1}$  peak ( $\text{M}+\text{H}^+$  calc: 1579.65344 amu; found: 1579.65 amu). Also present at  $\sim 800$  amu are the peaks resulting from cleavage of the S-S bond and the  $\text{M}^{+2}$  peak.

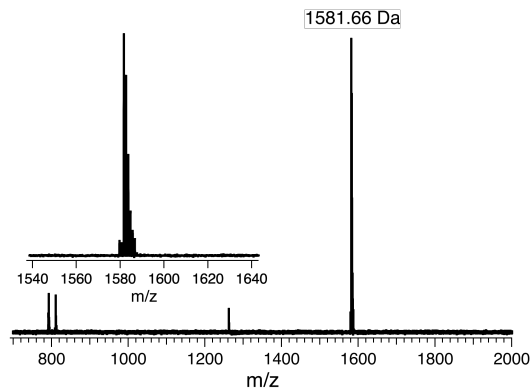

**Figure S19.** ESI-MS (positive ion mode) of peak 2 from the HPLC chromatogram in manuscript Fig. 5 obtained following injection of  $^{18}\text{O}_2(\text{g})$  into solutions of  $\{\text{Fe}(\text{II})(\text{nh1})(\text{OH}_2)\}$  and subsequent filtration. The inset is zoomed in on the  $\text{M}^{+1}$  peak ( $\text{M}+\text{H}^+$  calc: 1581.65769 amu; found: 1581.66 amu). Also present at  $\sim 800$  amu are the peaks resulting from cleavage of the S-S bond and the  $\text{M}^{+2}$  peak.

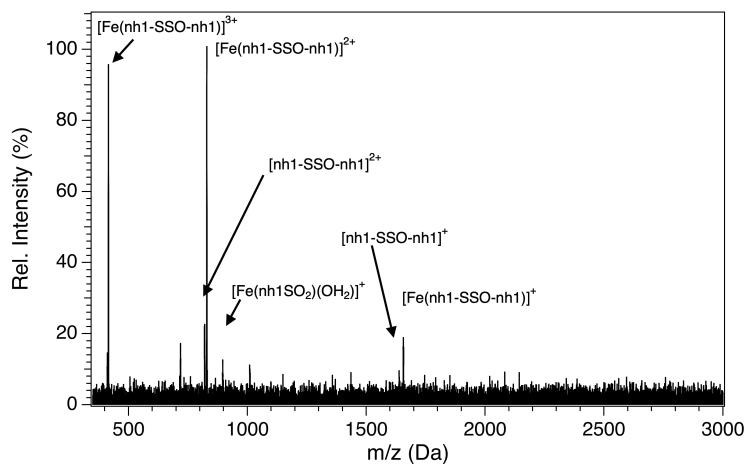

**Figure S20.** MALDI-TOF-MS (positive ion mode) of the solid generated in the reaction of  $\{\text{Fe(II)(nh1)(OH}_2)\}$  with  $\text{O}_2$ .

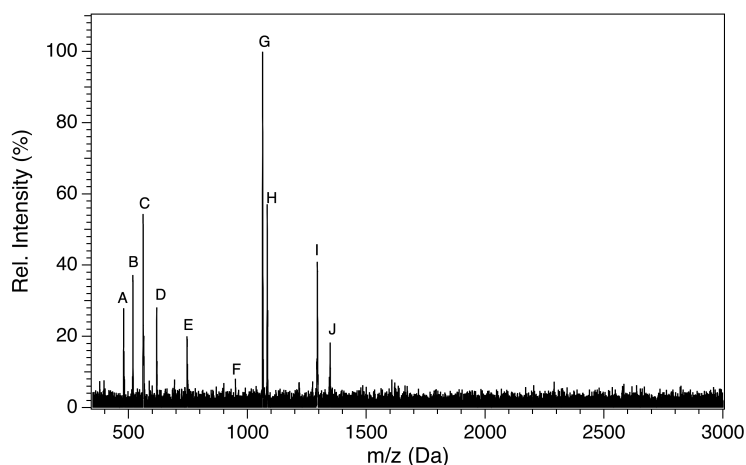

**Figure S21.** MALDI-TOF-MS (positive ion mode) of the solid generated in the reaction of  $\{\text{Fe(II)(nh1)(OH}_2)\}$  with  $\text{O}_2$ . Identified peaks from peptide cleavage or disulphide bond formation include A: HHDA, B: DLPCA, C: PCAPCA, D: HHDLP, E: HHDLPXA (X=C with loss of SH group), F:  $[\text{Fe}(\text{HHDLPCCA})]$ , G:  $[\text{Fe}(\text{DLPCA})_2]$ , H:  $[\text{Fe}(\text{DLPCA})_2(\text{OH}_2)]$ , I:  $[\text{Fe}(\text{HHDLP})_2]$ , J: HHDLPCADLPCA. All peptide with two Cys residues are likely the result of disulphide bond formation.

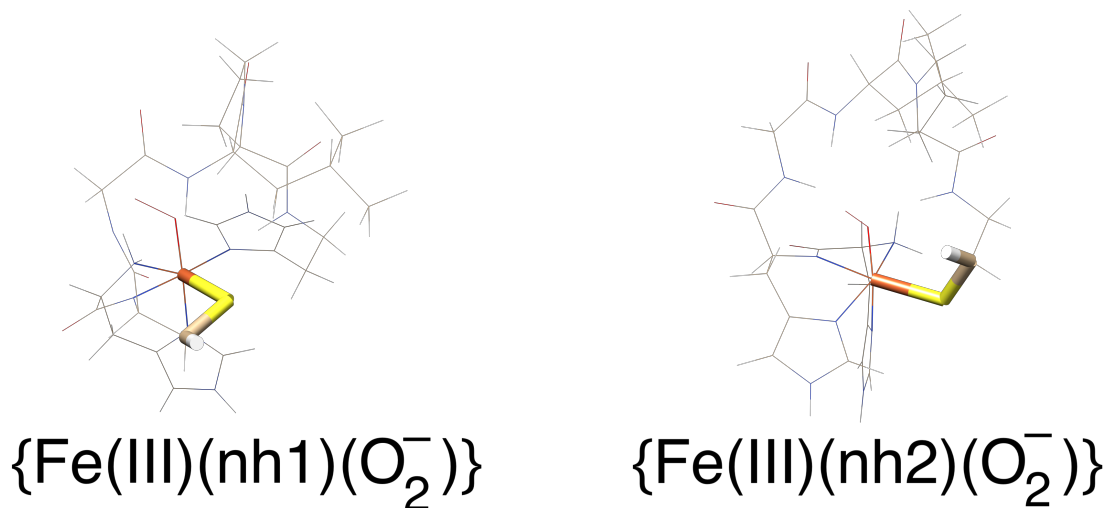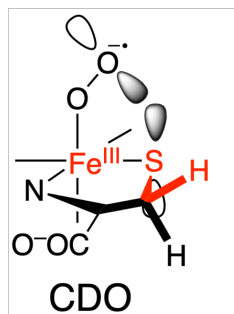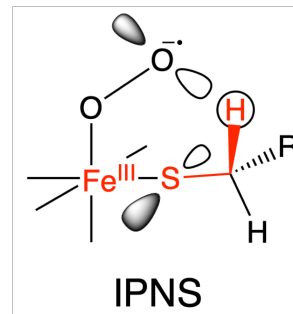

**Figure S22.** Top: wire representations of the minimized structures of  $\{\text{Fe(III)(nh1)(O}_2^-\}\}$  and  $\{\text{Fe(III)(nh2)(O}_2^-\}\}$ . The highlighted Fe-S-C-H bonds depict the key elements comprising the dihedral angle, imposed by the manner in-which the peptide wraps around the Fe-centre, that orients the S(3p<sub>p</sub>*i*) orbital in line or orthogonal to the superoxo moiety. Bottom: representations of the Fe(III)-O<sub>2</sub><sup>-</sup> substrate bound forms of CDO vs IPNS with the highlighted Fe-S-C-H bonds that define the dihedral that orients the S(3p<sub>p</sub>*i*) orbital in line or orthogonal to the superoxo moiety.

**Table S6.** Cartesian coordinates for the geometry optimized structure of {Fe(II)(nh1)(OH<sub>2</sub>)}.

---

|    |         |          |          |
|----|---------|----------|----------|
| Fe | 3.47104 | 27.72898 | 5.70441  |
| O  | 2.54946 | 26.91513 | 7.68993  |
| H  | 1.99918 | 26.11218 | 7.63921  |
| H  | 1.98517 | 27.56697 | 8.14189  |
| N  | 3.77277 | 25.50083 | 5.52671  |
| C  | 5.198   | 25.36012 | 5.16587  |
| C  | 6.06586 | 26.35024 | 5.96218  |
| O  | 7.31376 | 26.16887 | 5.96573  |
| C  | 5.36714 | 25.60486 | 3.65195  |
| C  | 5.23751 | 27.03043 | 3.21028  |
| N  | 4.31762 | 27.93349 | 3.73892  |
| C  | 5.97249 | 27.67641 | 2.23954  |
| C  | 4.4988  | 29.09008 | 3.09974  |
| N  | 5.48591 | 28.96722 | 2.18302  |
| N  | 5.3761  | 27.35378 | 6.51607  |
| C  | 6.13293 | 28.4382  | 7.11988  |
| C  | 5.96176 | 28.55414 | 8.63514  |
| O  | 6.72381 | 29.25914 | 9.32217  |
| C  | 5.67632 | 29.77111 | 6.48858  |
| S  | 3.84028 | 29.9178  | 6.52457  |
| N  | 4.89702 | 27.90352 | 9.15203  |
| C  | 4.49719 | 28.04508 | 10.53076 |
| C  | 3.79829 | 29.35435 | 10.91697 |
| O  | 3.57391 | 29.5841  | 12.1174  |
| N  | 3.43599 | 30.19753 | 9.92580  |

|   |          |          |          |
|---|----------|----------|----------|
| C | 2.80993  | 31.48389 | 10.23181 |
| C | 1.42187  | 31.37261 | 10.90321 |
| O | 1.20487  | 32.01129 | 11.94959 |
| C | 2.78963  | 32.36062 | 8.97226  |
| C | 2.09443  | 33.71867 | 9.12814  |
| C | 2.81615  | 34.62924 | 10.12817 |
| C | 1.98499  | 34.3891  | 7.75401  |
| N | 0.45227  | 30.60359 | 10.35218 |
| C | 0.50168  | 29.84257 | 9.106780 |
| C | 0.08503  | 30.68243 | 7.88766  |
| O | -0.72777 | 31.6175  | 7.96375  |
| C | -0.52378 | 28.71708 | 9.36028  |
| C | -1.60776 | 29.41918 | 10.19097 |
| C | -0.82745 | 30.41057 | 11.06604 |
| N | 0.63508  | 30.26439 | 6.7318   |
| C | 0.334    | 30.85936 | 5.43634  |
| C | 0.989    | 30.03554 | 4.31823  |
| C | 0.611    | 28.59101 | 4.38409  |
| H | 5.56894  | 24.34407 | 5.3794   |
| H | 4.62954  | 24.97316 | 3.12654  |
| H | 6.35828  | 25.24363 | 3.34787  |
| H | 6.77933  | 27.33603 | 1.60099  |
| H | 3.97076  | 30.01586 | 3.29689  |
| H | 5.82089  | 29.70469 | 1.56876  |
| H | 7.21314  | 28.30913 | 6.93766  |
| H | 6.015    | 29.79839 | 5.44251  |
| H | 6.12563  | 30.61798 | 7.02553  |

|   |           |          |          |
|---|-----------|----------|----------|
| H | 4.29183   | 27.38358 | 8.51084  |
| H | 3.64518   | 29.97615 | 8.93507  |
| H | 3.41471   | 31.96973 | 11.01063 |
| H | 2.32106   | 31.80092 | 8.150700 |
| H | 3.83607   | 32.51935 | 8.661910 |
| H | 1.06984   | 33.54007 | 9.498390 |
| H | 3.85159   | 34.81514 | 9.79989  |
| H | 2.85154   | 34.18548 | 11.13268 |
| H | 2.3072    | 35.60116 | 10.20724 |
| H | 2.98616   | 34.57064 | 7.33116  |
| H | 1.46761   | 35.35701 | 7.82586  |
| H | 1.42986   | 33.75419 | 7.04751  |
| H | 1.51257   | 29.45147 | 8.94589  |
| H | -0.0365   | 27.92369 | 9.94614  |
| H | -0.8992   | 28.27859 | 8.42727  |
| H | -2.19264  | 28.71546 | 10.79554 |
| H | -2.29758  | 29.95895 | 9.52929  |
| H | -1.34672  | 31.37035 | 11.18913 |
| H | -0.61422  | 30.0107  | 12.06876 |
| H | 1.36653   | 29.55062 | 6.76218  |
| H | 2.08055   | 30.12566 | 4.41311  |
| H | 0.69389   | 30.46828 | 3.35282  |
| H | -0.757934 | 30.88886 | 5.3053   |
| H | 0.7028    | 31.89761 | 5.40243  |
| H | 5.36991   | 27.9578  | 11.1933  |
| H | 3.80688   | 27.22747 | 10.78028 |
| C | -0.55999  | 27.99014 | 3.97376  |

|   |          |          |         |
|---|----------|----------|---------|
| N | -0.47038 | 26.67054 | 4.36336 |
| C | 0.72002  | 26.48863 | 4.98119 |
| N | 1.40682  | 27.63315 | 5.01448 |
| H | 1.0373   | 25.53499 | 5.38576 |
| H | -1.42954 | 28.38098 | 3.45817 |
| H | -1.17082 | 25.95086 | 4.20456 |
| H | 3.19985  | 24.96764 | 4.86642 |
| H | 3.61203  | 25.08788 | 6.44865 |

---

**Table S7.** Cartesian coordinates for the geometry optimized structure of {Fe(II)(nh<sub>2</sub>)(OH<sub>2</sub>)}.

---

|    |             |             |             |
|----|-------------|-------------|-------------|
| Fe | 3.660312962 | 28.13155086 | 4.88099199  |
| O  | 3.505405718 | 29.99376268 | 6.488194338 |
| H  | 2.531580546 | 30.15342597 | 6.510025762 |
| H  | 3.862468956 | 30.75426887 | 5.992060623 |
| N  | 2.863536914 | 26.55876646 | 6.246852457 |
| C  | 3.926428673 | 25.53710076 | 6.352684576 |
| C  | 5.301869156 | 26.22032234 | 6.444639161 |
| O  | 6.271858017 | 25.54795805 | 6.885217368 |
| C  | 3.848630455 | 24.5548088  | 5.176313912 |
| C  | 4.197838568 | 25.1211191  | 3.833258083 |
| N  | 4.021707562 | 26.45622154 | 3.481684884 |
| C  | 4.687045001 | 24.43561557 | 2.739900376 |
| C  | 4.38453406  | 26.5635901  | 2.203487462 |
| N  | 4.788944471 | 25.36175654 | 1.72331953  |
| N  | 5.315503582 | 27.50846832 | 6.070379058 |
| C  | 6.572690576 | 28.1928785  | 6.324197044 |
| C  | 6.797127844 | 28.41075972 | 7.836453383 |
| O  | 7.918112428 | 28.63900735 | 8.315093825 |
| C  | 6.639710424 | 29.60768619 | 5.697700542 |
| N  | 5.64674172  | 28.41984696 | 8.554772131 |
| C  | 5.585686038 | 28.58433021 | 9.985186576 |
| C  | 4.566268651 | 29.59621611 | 10.5009844  |
| O  | 4.4127703   | 29.72604372 | 11.72574936 |
| N  | 3.858654663 | 30.30828218 | 9.59358099  |
| C  | 2.908494521 | 31.33056767 | 10.02954433 |

|   |              |             |             |
|---|--------------|-------------|-------------|
| C | 1.685078276  | 30.76852819 | 10.79311163 |
| O | 1.385101114  | 31.2717417  | 11.89153893 |
| C | 2.528957885  | 32.23210314 | 8.847873725 |
| C | 1.562502986  | 33.37630278 | 9.180888411 |
| C | 2.161543924  | 34.37735532 | 10.17476533 |
| C | 1.14777218   | 34.07495196 | 7.881000895 |
| N | 0.958673846  | 29.7447615  | 10.28284088 |
| C | 1.051323461  | 29.12803345 | 8.962425972 |
| C | 0.280156906  | 29.94914378 | 7.906814304 |
| O | -0.549218472 | 30.81126953 | 8.210089327 |
| C | 0.389533592  | 27.75326768 | 9.186823571 |
| C | -0.742027856 | 28.08058162 | 10.17117893 |
| C | -0.146526537 | 29.16696402 | 11.0779567  |
| N | 0.627235986  | 29.66238798 | 6.618483467 |
| C | -0.031071361 | 30.26332799 | 5.460638454 |
| C | 0.916920138  | 30.27176756 | 4.262018292 |
| S | 1.567828842  | 28.59689807 | 3.849330911 |
| H | 1.985988253  | 26.14223471 | 5.926018383 |
| H | 3.815575367  | 24.94707028 | 7.277330924 |
| H | 2.82692221   | 24.13674446 | 5.155170643 |
| H | 4.520679304  | 23.71156286 | 5.386927952 |
| H | 4.957177479  | 23.39494975 | 2.60184715  |
| H | 4.379822764  | 27.46973248 | 1.610292393 |
| H | 5.118204745  | 25.1801458  | 0.779193002 |
| H | 7.43136433   | 27.59954443 | 5.96785462  |
| H | 4.818562828  | 28.1245081  | 8.035040247 |
| H | 4.026219632  | 30.18503981 | 8.589616831 |

|   |              |             |             |
|---|--------------|-------------|-------------|
| H | 3.410196955  | 31.9355654  | 10.79742614 |
| H | 2.083498265  | 31.62436641 | 8.049431465 |
| H | 3.462992561  | 32.65039023 | 8.436209277 |
| H | 0.65741218   | 32.93433257 | 9.630839205 |
| H | 3.087769258  | 34.81609253 | 9.76967051  |
| H | 2.399703223  | 33.9072684  | 11.13888645 |
| H | 1.455721888  | 35.19849055 | 10.36773482 |
| H | 2.025546042  | 34.51453198 | 7.380528843 |
| H | 0.431148625  | 34.8850355  | 8.079983838 |
| H | 0.67949057   | 33.36488003 | 7.18328085  |
| H | 2.097313068  | 29.02210274 | 8.651890834 |
| H | 1.129949258  | 27.0826317  | 9.645115079 |
| H | 0.041158576  | 27.29672372 | 8.251879351 |
| H | -1.068093205 | 27.20379732 | 10.74331875 |
| H | -1.611911876 | 28.47440693 | 9.628015257 |
| H | -0.872933174 | 29.94618103 | 11.34395722 |
| H | 0.266218186  | 28.75579445 | 12.01139549 |
| H | 1.082842317  | 28.76682127 | 6.408647113 |
| H | 1.758576523  | 30.95405823 | 4.451992691 |
| H | 0.369673558  | 30.65845184 | 3.391386398 |
| H | 2.68169048   | 26.95756563 | 7.170638488 |
| H | -0.948892009 | 29.7035905  | 5.215097963 |
| H | -0.318169863 | 31.28766003 | 5.735685853 |
| H | 6.578687423  | 28.90374111 | 10.33278169 |
| H | 5.355206432  | 27.63035709 | 10.48719021 |
| C | 6.248906377  | 29.73350195 | 4.264992234 |
| N | 4.956309008  | 29.46459516 | 3.823960621 |

|   |             |             |             |
|---|-------------|-------------|-------------|
| C | 6.97491652  | 30.24519541 | 3.209869371 |
| N | 6.106670165 | 30.2971813  | 2.137441773 |
| C | 4.901991772 | 29.82464427 | 2.541632208 |
| H | 4.028419988 | 29.75953134 | 1.901809241 |
| H | 6.326844928 | 30.64236048 | 1.20711951  |
| H | 7.666228043 | 29.97815448 | 5.820189126 |
| H | 5.994733696 | 30.27402613 | 6.291925598 |
| H | 8.000130614 | 30.58989878 | 3.138582501 |

---

**Table S8.** Cartesian coordinates for the geometry optimized structure of the AILFT minimized model {Fe/Co(II)(nh1)(OH<sub>2</sub>)}.

---

|       |          |          |         |
|-------|----------|----------|---------|
| Fe/Co | 3.42088  | 27.67359 | 5.82815 |
| O     | 2.50212  | 26.932   | 7.71875 |
| H     | 1.52737  | 26.98171 | 7.67631 |
| H     | 2.74978  | 27.66634 | 8.31716 |
| N     | 3.77001  | 25.43558 | 5.60741 |
| C     | 5.19087  | 25.32338 | 5.21747 |
| C     | 6.06119  | 26.33166 | 5.98772 |
| O     | 7.31245  | 26.1721  | 5.95267 |
| H     | 1.00831  | 25.5278  | 5.21833 |
| C     | 5.17817  | 26.99128 | 3.26948 |
| N     | 4.26683  | 27.88208 | 3.823   |
| C     | 5.89759  | 27.64403 | 2.29302 |
| C     | 4.43793  | 29.04074 | 3.18996 |
| N     | 5.40929  | 28.93237 | 2.25558 |
| N     | 5.37249  | 27.32195 | 6.56356 |
| C     | 6.12664  | 28.41707 | 7.14936 |
| H     | 5.94771  | 28.46576 | 8.24014 |
| H     | -1.13308 | 25.98357 | 3.92961 |
| C     | 5.65205  | 29.7411  | 6.51379 |
| S     | 3.81616  | 29.88866 | 6.58787 |
| H     | -1.36633 | 28.43694 | 3.28189 |
| N     | -0.4465  | 26.69689 | 4.16192 |
| H     | 0.92806  | 29.65485 | 4.30306 |
| H     | 5.5884   | 24.31411 | 5.4259  |
| C     | 0.61176  | 28.61814 | 4.34407 |

|   |          |          |         |
|---|----------|----------|---------|
| C | 0.7067   | 26.49807 | 4.84048 |
| N | 1.37841  | 27.64132 | 4.9734  |
| C | -0.52577 | 28.03156 | 3.83393 |
| H | 3.64201  | 25.10862 | 6.56891 |
| H | 6.69552  | 27.31054 | 1.63896 |
| H | 3.90594  | 29.96201 | 3.40179 |
| H | 5.73223  | 29.67672 | 1.64308 |
| H | 7.21121  | 28.28568 | 6.99002 |
| H | 5.97067  | 29.77631 | 5.45971 |
| H | 3.20704  | 24.82069 | 5.01164 |
| H | 6.11029  | 30.59767 | 7.03319 |
| C | 5.32212  | 25.56475 | 3.70008 |
| H | 4.57549  | 24.92944 | 3.19007 |
| H | 6.30659  | 25.20506 | 3.37037 |

---

**Table S9.** Cartesian coordinates for the geometry optimized structure of the AILFT minimized model {Fe/Co(II)(nh<sub>2</sub>)(OH<sub>2</sub>)}.

---

|       |         |          |         |
|-------|---------|----------|---------|
| Fe/Co | 3.65822 | 28.19636 | 4.95089 |
| O     | 3.46253 | 29.90206 | 6.38009 |
| H     | 2.57804 | 30.04192 | 6.76754 |
| H     | 3.66713 | 30.74082 | 5.92544 |
| N     | 2.88224 | 26.58045 | 6.28215 |
| C     | 3.94579 | 25.55657 | 6.36433 |
| C     | 5.3232  | 26.2349  | 6.45481 |
| O     | 6.29577 | 25.55201 | 6.87463 |
| H     | 7.67144 | 30.01884 | 5.89046 |
| C     | 4.21434 | 25.17913 | 3.84296 |
| N     | 4.02476 | 26.51393 | 3.51044 |
| C     | 4.72062 | 24.51097 | 2.74823 |
| C     | 4.39611 | 26.63669 | 2.2385  |
| N     | 4.81975 | 25.44845 | 1.74455 |
| N     | 5.33573 | 27.52866 | 6.10444 |
| C     | 6.59089 | 28.21131 | 6.36735 |
| H     | 6.76996 | 28.29611 | 7.4559  |
| H     | 1.99991 | 26.16689 | 5.96956 |
| C     | 6.64873 | 29.63435 | 5.75906 |
| H     | 3.84051 | 24.94089 | 7.27433 |
| H     | 4.0733  | 29.82379 | 1.9467  |
| N     | 4.97858 | 29.51248 | 3.87709 |
| C     | 7.00917 | 30.27122 | 3.27656 |
| C     | 6.26859 | 29.7684  | 4.32422 |
| H     | 5.9913  | 30.29135 | 6.35159 |

|   |          |          |         |
|---|----------|----------|---------|
| H | 8.03884  | 30.60538 | 3.213   |
| H | 5.00251  | 23.47435 | 2.59992 |
| H | 4.38485  | 27.54675 | 1.65094 |
| H | 5.15935  | 25.28321 | 0.80088 |
| H | 7.44291  | 27.62693 | 5.96877 |
| H | 6.38084  | 30.67532 | 1.2699  |
| H | 0.31786  | 30.6284  | 3.41221 |
| N | 6.15164  | 30.33243 | 2.19891 |
| H | -0.48106 | 31.21067 | 5.72279 |
| H | -0.9291  | 29.53673 | 5.30257 |
| H | 2.7095   | 26.97841 | 7.20887 |
| C | 4.94075  | 29.87362 | 2.59684 |
| H | 1.68751  | 30.95516 | 4.47813 |
| H | 0.43192  | 29.83606 | 6.39599 |
| C | -0.07923 | 30.20874 | 5.49499 |
| C | 0.86201  | 30.2522  | 4.29232 |
| S | 1.5612   | 28.60272 | 3.85943 |
| C | 3.84412  | 24.59846 | 5.15627 |
| H | 2.80974  | 24.20978 | 5.12604 |
| H | 4.48583  | 23.72752 | 5.35384 |

---

**Table S10.** Cartesian coordinates for the geometry optimized structure of low-spin  $\{\text{Fe(III)(nh1)(O}_2^-)\}$  possessing an  $s = \frac{1}{2}$  Fe(III) center antiferromagnetically coupled to the  $s = \frac{1}{2}$   $\text{O}_2^-$  ( $J = -934.96 \text{ cm}^{-1}$ ).

|    |             |             |             |
|----|-------------|-------------|-------------|
| O  | 2.698875013 | 27.70578123 | 7.345827735 |
| O  | 2.920869304 | 26.70587768 | 8.208206245 |
| Fe | 3.526734311 | 27.77446678 | 5.762623927 |
| N  | 3.510434048 | 25.75925633 | 5.809860648 |
| C  | 4.890036002 | 25.27111654 | 5.610155664 |
| C  | 5.85232245  | 26.25439531 | 6.291601851 |
| O  | 7.029478055 | 25.93777595 | 6.549741658 |
| C  | 5.192462921 | 25.1609067  | 4.112279254 |
| C  | 4.943248205 | 26.43455672 | 3.351743229 |
| N  | 4.244049192 | 27.52784971 | 3.862196953 |
| C  | 5.293248261 | 26.72053664 | 2.040290904 |
| C  | 4.173164218 | 28.4431148  | 2.886551979 |
| N  | 4.795199233 | 27.98097052 | 1.776463655 |
| N  | 5.273009715 | 27.46118097 | 6.495696324 |
| C  | 6.085265173 | 28.56073337 | 6.992193867 |
| C  | 5.780384781 | 28.97791424 | 8.443530504 |
| O  | 6.192049835 | 30.07222666 | 8.888086257 |
| C  | 5.908086644 | 29.74616467 | 6.052323043 |
| S  | 4.110263561 | 29.96607853 | 5.730757487 |
| N  | 5.110274622 | 28.08408777 | 9.199078007 |
| C  | 4.855345335 | 28.2872417  | 10.6136363  |
| C  | 3.694369372 | 29.23503891 | 10.97569465 |
| O  | 2.894110692 | 28.9547285  | 11.87832941 |
| N  | 3.655273778 | 30.38486455 | 10.24961891 |

|   |              |             |             |
|---|--------------|-------------|-------------|
| C | 2.755409866  | 31.50168512 | 10.53838352 |
| C | 1.338021841  | 31.07516377 | 10.989374   |
| O | 0.890926833  | 31.50866162 | 12.06659659 |
| C | 2.765951133  | 32.46284835 | 9.332258829 |
| C | 1.68727174   | 33.56035011 | 9.339358657 |
| C | 1.782796822  | 34.47043565 | 10.57346298 |
| C | 1.764785373  | 34.36838762 | 8.035991348 |
| N | 0.578307314  | 30.27262078 | 10.19662601 |
| C | 0.898839478  | 29.73594893 | 8.873072291 |
| C | 0.381620423  | 30.65425064 | 7.749543384 |
| O | -0.714850643 | 31.23384548 | 7.814912698 |
| C | 0.114962499  | 28.40410084 | 8.851848935 |
| C | -1.158527063 | 28.73558503 | 9.647883467 |
| C | -0.68669804  | 29.73011882 | 10.72417095 |
| N | 1.204423426  | 30.70651777 | 6.673993411 |
| C | 0.853545711  | 31.32057943 | 5.405977042 |
| C | 1.291331646  | 30.44390732 | 4.209868569 |
| C | 0.865301586  | 29.01692389 | 4.369287438 |
| H | 5.027870397  | 24.2705579  | 6.070467784 |
| H | 4.569274327  | 24.34393216 | 3.685620856 |
| H | 6.247578056  | 24.84476861 | 3.987706035 |
| H | 5.840710963  | 26.13733669 | 1.293695681 |
| H | 3.715934004  | 29.43250616 | 2.966231567 |
| H | 4.892602125  | 28.49323508 | 0.895244581 |
| H | 7.150272701  | 28.22783971 | 7.003516292 |
| H | 6.418824023  | 29.55193018 | 5.087696184 |
| H | 6.312650215  | 30.67276708 | 6.50247023  |

|   |              |             |             |
|---|--------------|-------------|-------------|
| H | 4.568533125  | 27.33402937 | 8.725561486 |
| H | 4.484411032  | 30.57774713 | 9.659388689 |
| H | 3.127611797  | 32.04211513 | 11.43525304 |
| H | 2.672872012  | 31.86975717 | 8.401137998 |
| H | 3.771862654  | 32.93773337 | 9.289676395 |
| H | 0.69515288   | 33.05495067 | 9.35741271  |
| H | 2.781155079  | 34.95594905 | 10.62932854 |
| H | 1.621197208  | 33.90012996 | 11.50954283 |
| H | 1.018845007  | 35.27413056 | 10.53060609 |
| H | 2.739002666  | 34.89688582 | 7.953991867 |
| H | 0.96116686   | 35.13162466 | 7.988841911 |
| H | 1.663701743  | 33.70963444 | 7.149197859 |
| H | 1.984617854  | 29.56733366 | 8.761819869 |
| H | 0.734749675  | 27.63109889 | 9.348191234 |
| H | -0.082344594 | 28.05551694 | 7.820074155 |
| H | -1.632079421 | 27.83865135 | 10.09208334 |
| H | -1.897038328 | 29.22479666 | 8.984276133 |
| H | -1.416950057 | 30.54324846 | 10.91287817 |
| H | -0.480873007 | 29.24130556 | 11.70093157 |
| H | 2.129460514  | 30.25414113 | 6.745526097 |
| H | 2.391139278  | 30.50897048 | 4.099912892 |
| H | 0.843642585  | 30.86696058 | 3.288614969 |
| H | -0.245301166 | 31.46492271 | 5.412979685 |
| H | 1.317574037  | 32.32764403 | 5.3081744   |
| H | 5.773046682  | 28.69851789 | 11.08785176 |
| H | 4.628942864  | 27.31291903 | 11.0832109  |
| C | -0.402856048 | 28.52005942 | 4.097203099 |

|   |              |             |             |
|---|--------------|-------------|-------------|
| N | -0.419694265 | 27.22340866 | 4.560187436 |
| C | 0.794605504  | 26.94459474 | 5.091380082 |
| N | 1.610427559  | 28.00523515 | 4.987667823 |
| H | 1.017808891  | 25.98230163 | 5.559219105 |
| H | -1.27498501  | 28.99210858 | 3.634669001 |
| H | -1.20903904  | 26.57259619 | 4.516432177 |
| H | 2.858713446  | 25.24384612 | 5.199697208 |
| H | 3.225458508  | 25.63193531 | 6.814091678 |

---

**Table S11.** Cartesian coordinates for the geometry optimized structure of intermediate-spin  $\{\text{Fe(III)(nh1)(O}_2^-)\}$  possessing an  $s = \frac{3}{2}$  Fe(III) center antiferromagnetically coupled to the  $s = \frac{1}{2}$   $\text{O}_2^-$  ( $J = -893.67 \text{ cm}^{-1}$ )

|    |             |             |             |
|----|-------------|-------------|-------------|
| O  | 2.698875013 | 27.70578123 | 7.345827735 |
| O  | 2.920869304 | 26.70587768 | 8.208206245 |
| Fe | 3.526734311 | 27.77446678 | 5.762623927 |
| N  | 3.510434048 | 25.75925633 | 5.809860648 |
| C  | 4.890036002 | 25.27111654 | 5.610155664 |
| C  | 5.85232245  | 26.25439531 | 6.291601851 |
| O  | 7.029478055 | 25.93777595 | 6.549741658 |
| C  | 5.192462921 | 25.1609067  | 4.112279254 |
| C  | 4.943248205 | 26.43455672 | 3.351743229 |
| N  | 4.244049192 | 27.52784971 | 3.862196953 |
| C  | 5.293248261 | 26.72053664 | 2.040290904 |
| C  | 4.173164218 | 28.4431148  | 2.886551979 |
| N  | 4.795199233 | 27.98097052 | 1.776463655 |
| N  | 5.273009715 | 27.46118097 | 6.495696324 |
| C  | 6.085265173 | 28.56073337 | 6.992193867 |
| C  | 5.780384781 | 28.97791424 | 8.443530504 |
| O  | 6.192049835 | 30.07222666 | 8.888086257 |
| C  | 5.908086644 | 29.74616467 | 6.052323043 |
| S  | 4.110263561 | 29.96607853 | 5.730757487 |
| N  | 5.110274622 | 28.08408777 | 9.199078007 |
| C  | 4.855345335 | 28.2872417  | 10.6136363  |
| C  | 3.694369372 | 29.23503891 | 10.97569465 |
| O  | 2.894110692 | 28.9547285  | 11.87832941 |
| N  | 3.655273778 | 30.38486455 | 10.24961891 |

|   |              |             |             |
|---|--------------|-------------|-------------|
| C | 2.755409866  | 31.50168512 | 10.53838352 |
| C | 1.338021841  | 31.07516377 | 10.989374   |
| O | 0.890926833  | 31.50866162 | 12.06659659 |
| C | 2.765951133  | 32.46284835 | 9.332258829 |
| C | 1.68727174   | 33.56035011 | 9.339358657 |
| C | 1.782796822  | 34.47043565 | 10.57346298 |
| C | 1.764785373  | 34.36838762 | 8.035991348 |
| N | 0.578307314  | 30.27262078 | 10.19662601 |
| C | 0.898839478  | 29.73594893 | 8.873072291 |
| C | 0.381620423  | 30.65425064 | 7.749543384 |
| O | -0.714850643 | 31.23384548 | 7.814912698 |
| C | 0.114962499  | 28.40410084 | 8.851848935 |
| C | -1.158527063 | 28.73558503 | 9.647883467 |
| C | -0.68669804  | 29.73011882 | 10.72417095 |
| N | 1.204423426  | 30.70651777 | 6.673993411 |
| C | 0.853545711  | 31.32057943 | 5.405977042 |
| C | 1.291331646  | 30.44390732 | 4.209868569 |
| C | 0.865301586  | 29.01692389 | 4.369287438 |
| H | 5.027870397  | 24.2705579  | 6.070467784 |
| H | 4.569274327  | 24.34393216 | 3.685620856 |
| H | 6.247578056  | 24.84476861 | 3.987706035 |
| H | 5.840710963  | 26.13733669 | 1.293695681 |
| H | 3.715934004  | 29.43250616 | 2.966231567 |
| H | 4.892602125  | 28.49323508 | 0.895244581 |
| H | 7.150272701  | 28.22783971 | 7.003516292 |
| H | 6.418824023  | 29.55193018 | 5.087696184 |
| H | 6.312650215  | 30.67276708 | 6.50247023  |

|   |              |             |             |
|---|--------------|-------------|-------------|
| H | 4.568533125  | 27.33402937 | 8.725561486 |
| H | 4.484411032  | 30.57774713 | 9.659388689 |
| H | 3.127611797  | 32.04211513 | 11.43525304 |
| H | 2.672872012  | 31.86975717 | 8.401137998 |
| H | 3.771862654  | 32.93773337 | 9.289676395 |
| H | 0.69515288   | 33.05495067 | 9.35741271  |
| H | 2.781155079  | 34.95594905 | 10.62932854 |
| H | 1.621197208  | 33.90012996 | 11.50954283 |
| H | 1.018845007  | 35.27413056 | 10.53060609 |
| H | 2.739002666  | 34.89688582 | 7.953991867 |
| H | 0.96116686   | 35.13162466 | 7.988841911 |
| H | 1.663701743  | 33.70963444 | 7.149197859 |
| H | 1.984617854  | 29.56733366 | 8.761819869 |
| H | 0.734749675  | 27.63109889 | 9.348191234 |
| H | -0.082344594 | 28.05551694 | 7.820074155 |
| H | -1.632079421 | 27.83865135 | 10.09208334 |
| H | -1.897038328 | 29.22479666 | 8.984276133 |
| H | -1.416950057 | 30.54324846 | 10.91287817 |
| H | -0.480873007 | 29.24130556 | 11.70093157 |
| H | 2.129460514  | 30.25414113 | 6.745526097 |
| H | 2.391139278  | 30.50897048 | 4.099912892 |
| H | 0.843642585  | 30.86696058 | 3.288614969 |
| H | -0.245301166 | 31.46492271 | 5.412979685 |
| H | 1.317574037  | 32.32764403 | 5.3081744   |
| H | 5.773046682  | 28.69851789 | 11.08785176 |
| H | 4.628942864  | 27.31291903 | 11.0832109  |
| C | -0.402856048 | 28.52005942 | 4.097203099 |

|   |              |             |             |
|---|--------------|-------------|-------------|
| N | -0.419694265 | 27.22340866 | 4.560187436 |
| C | 0.794605504  | 26.94459474 | 5.091380082 |
| N | 1.610427559  | 28.00523515 | 4.987667823 |
| H | 1.017808891  | 25.98230163 | 5.559219105 |
| H | -1.27498501  | 28.99210858 | 3.634669001 |
| H | -1.20903904  | 26.57259619 | 4.516432177 |
| H | 2.858713446  | 25.24384612 | 5.199697208 |
| H | 3.225458508  | 25.63193531 | 6.814091678 |

---

**Table S12.** Cartesian coordinates for the geometry optimized structure of high-spin  $\{\text{Fe(III)(nh1)(O}_2^-)\}$  possessing an  $s = \frac{5}{2}$  Fe(III) center antiferromagnetically coupled to the  $s = \frac{1}{2}$   $\text{O}_2^-$  ( $J = -220.70 \text{ cm}^{-1}$ )

|    |          |           |           |
|----|----------|-----------|-----------|
| O  | 2.803405 | 27.77072  | 7.412058  |
| O  | 2.952582 | 26.695307 | 8.214964  |
| Fe | 3.533011 | 27.80946  | 5.737252  |
| N  | 3.47128  | 25.795692 | 5.816467  |
| C  | 4.840432 | 25.279737 | 5.620029  |
| C  | 5.824032 | 26.251149 | 6.289286  |
| O  | 6.990424 | 25.91292  | 6.565628  |
| C  | 5.140849 | 25.147845 | 4.122836  |
| C  | 4.948451 | 26.427489 | 3.356333  |
| N  | 4.27602  | 27.543003 | 3.853959  |
| C  | 5.339262 | 26.706523 | 2.055114  |
| C  | 4.259495 | 28.464687 | 2.881121  |
| N  | 4.891094 | 27.983845 | 1.784393  |
| N  | 5.275772 | 27.477547 | 6.46042   |
| C  | 6.090555 | 28.56803  | 6.967787  |
| C  | 5.790816 | 28.974442 | 8.4256030 |
| O  | 6.193911 | 30.073463 | 8.8670970 |
| C  | 5.911193 | 29.763519 | 6.038534  |
| S  | 4.110805 | 29.981831 | 5.72193   |
| N  | 5.14043  | 28.0718   | 9.187987  |
| C  | 4.884378 | 28.289503 | 10.600625 |
| C  | 3.704548 | 29.21897  | 10.951885 |
| O  | 2.897736 | 28.92376  | 11.843985 |
| N  | 3.657358 | 30.37283  | 10.232086 |

|   |           |           |           |
|---|-----------|-----------|-----------|
| C | 2.74985   | 31.481967 | 10.528989 |
| C | 1.332154  | 31.046839 | 10.971603 |
| O | 0.883044  | 31.463431 | 12.054619 |
| C | 2.759289  | 32.456339 | 9.333568  |
| C | 1.672149  | 33.545479 | 9.347546  |
| C | 1.75902   | 34.446281 | 10.589124 |
| C | 1.744145  | 34.364065 | 8.050526  |
| N | 0.572942  | 30.258623 | 10.163981 |
| C | 0.901136  | 29.738446 | 8.83619   |
| C | 0.380583  | 30.661181 | 7.717441  |
| O | -0.725332 | 31.222751 | 7.775147  |
| C | 0.128996  | 28.400344 | 8.799363  |
| C | -1.150224 | 28.71341  | 9.594118  |
| C | -0.691333 | 29.703781 | 10.680353 |
| N | 1.21725   | 30.737448 | 6.65333   |
| C | 0.873625  | 31.338526 | 5.377288  |
| C | 1.283932  | 30.430988 | 4.192139  |
| C | 0.8464    | 29.014133 | 4.398686  |
| H | 4.960025  | 24.281858 | 6.091201  |
| H | 4.484351  | 24.355371 | 3.699762  |
| H | 6.182201  | 24.788077 | 4.001175  |
| H | 5.884061  | 26.107245 | 1.319383  |
| H | 3.832727  | 29.468444 | 2.954526  |
| H | 5.025991  | 28.494652 | 0.907217  |
| H | 7.155297  | 28.234427 | 6.972539  |
| H | 6.419526  | 29.57719  | 5.071584  |
| H | 6.312504  | 30.688422 | 6.494537  |

|   |           |           |           |
|---|-----------|-----------|-----------|
| H | 4.574387  | 27.327015 | 8.729285  |
| H | 4.486795  | 30.575474 | 9.6457    |
| H | 3.116858  | 32.014311 | 11.432842 |
| H | 2.67419   | 31.872612 | 8.395971  |
| H | 3.761642  | 32.939353 | 9.300548  |
| H | 0.683787  | 33.032567 | 9.360443  |
| H | 2.752911  | 34.940316 | 10.649482 |
| H | 1.602277  | 33.86676  | 11.520374 |
| H | 0.987783  | 35.243309 | 10.552791 |
| H | 2.715477  | 34.898267 | 7.971293  |
| H | 0.936538  | 35.123487 | 8.010477  |
| H | 1.644859  | 33.711376 | 7.159146  |
| H | 1.988376  | 29.577533 | 8.72611   |
| H | 0.754234  | 27.627888 | 9.289636  |
| H | -0.063402 | 28.059048 | 7.763952  |
| H | -1.615822 | 27.80824  | 10.030046 |
| H | -1.891541 | 29.200183 | 8.93196   |
| H | -1.428816 | 30.510127 | 10.870516 |
| H | -0.487834 | 29.209712 | 11.654851 |
| H | 2.143735  | 30.291195 | 6.734378  |
| H | 2.381894  | 30.4795   | 4.06085   |
| H | 0.824452  | 30.836339 | 3.268743  |
| H | -0.221815 | 31.505988 | 5.388689  |
| H | 1.359642  | 32.33276  | 5.26076   |
| H | 5.794578  | 28.72446  | 11.067673 |
| H | 4.675719  | 27.317285 | 11.082849 |
| C | -0.437764 | 28.528232 | 4.191779  |

|   |           |           |          |
|---|-----------|-----------|----------|
| N | -0.455077 | 27.248277 | 4.699803 |
| C | 0.773649  | 26.967499 | 5.193638 |
| N | 1.60073   | 28.011106 | 5.020934 |
| H | 0.998613  | 26.01995  | 5.689255 |
| H | -1.320854 | 28.997929 | 3.748119 |
| H | -1.255156 | 26.609136 | 4.708795 |
| H | 2.805327  | 25.283528 | 5.219548 |
| H | 3.18971   | 25.705917 | 6.834215 |

---

**Table S13.** Cartesian coordinates for the geometry optimized structure of low-spin  $\{\text{Fe(III)(nh}_2\text{)(O}_2^-\}\}$  possessing an  $s = \frac{1}{2}$  Fe(III) center antiferromagnetically coupled to the  $s = \frac{1}{2}$   $\text{O}_2^-$  ( $J = -551.22 \text{ cm}^{-1}$ ).

|    |             |             |             |
|----|-------------|-------------|-------------|
| O  | 3.827459631 | 29.19551706 | 6.516255547 |
| O  | 4.224440334 | 30.46517405 | 6.623926141 |
| Fe | 4.151473918 | 28.12828212 | 5.068722944 |
| N  | 3.288289835 | 26.66104121 | 6.116116883 |
| C  | 4.264954667 | 25.55266695 | 6.24531834  |
| C  | 5.660923999 | 26.17026634 | 6.431850079 |
| O  | 6.571050873 | 25.53759709 | 7.002053157 |
| C  | 4.20163686  | 24.64175648 | 5.019276235 |
| C  | 4.509618794 | 25.35650994 | 3.736583019 |
| N  | 4.449300202 | 26.73948264 | 3.592707209 |
| C  | 4.853179155 | 24.79936634 | 2.515603563 |
| C  | 4.743371859 | 27.00381814 | 2.313853305 |
| N  | 4.989387738 | 25.85569062 | 1.641867076 |
| N  | 5.752313907 | 27.44018358 | 5.959323683 |
| C  | 6.963637019 | 28.15095896 | 6.340176853 |
| C  | 7.088694289 | 28.28038412 | 7.880657949 |
| O  | 8.186211966 | 28.33077561 | 8.447802344 |
| C  | 7.034770143 | 29.60361883 | 5.810129861 |
| N  | 5.891928376 | 28.45124366 | 8.516156821 |
| C  | 5.774824666 | 28.65001083 | 9.940218299 |
| C  | 4.861609511 | 29.784358   | 10.42041381 |
| O  | 4.686298237 | 29.9297459  | 11.64106547 |
| N  | 4.250602954 | 30.56697619 | 9.494193538 |
| C  | 3.345032367 | 31.63298946 | 9.920191035 |

|   |             |             |             |
|---|-------------|-------------|-------------|
| C | 2.162100009 | 31.14678143 | 10.79525447 |
| O | 1.904034337 | 31.73975251 | 11.85784597 |
| C | 2.892693217 | 32.44257158 | 8.690164577 |
| C | 1.794347558 | 33.48989303 | 8.935985307 |
| C | 2.196519887 | 34.53095101 | 9.990947808 |
| C | 1.420824054 | 34.15604852 | 7.60342641  |
| N | 1.40191781  | 30.09175824 | 10.38973174 |
| C | 1.452513091 | 29.36180585 | 9.123130307 |
| C | 0.655842126 | 30.09047688 | 8.015217871 |
| O | -0.30288233 | 30.84186415 | 8.255206245 |
| C | 0.783473335 | 28.01818491 | 9.486756324 |
| C | -0.32089103 | 28.44883397 | 10.46663975 |
| C | 0.322701649 | 29.59551762 | 11.26544629 |
| N | 1.094340905 | 29.77938768 | 6.774097587 |
| C | 0.606003015 | 30.36556692 | 5.536645795 |
| C | 1.703002708 | 30.33287109 | 4.467621823 |
| S | 2.203882034 | 28.61646326 | 4.005414327 |
| H | 2.400506418 | 26.34190969 | 5.699268941 |
| H | 4.049834782 | 24.94373027 | 7.146758445 |
| H | 3.189764877 | 24.18153328 | 4.970417385 |
| H | 4.91668552  | 23.80778207 | 5.163873331 |
| H | 5.000254537 | 23.75899099 | 2.21114802  |
| H | 4.791830858 | 27.98966578 | 1.84632213  |
| H | 5.239193818 | 25.79321747 | 0.651108833 |
| H | 7.859612198 | 27.58369142 | 6.008764548 |
| H | 5.040976187 | 28.35942975 | 7.947354965 |
| H | 4.405338291 | 30.46272476 | 8.468025347 |

|   |              |             |             |
|---|--------------|-------------|-------------|
| H | 3.891008371  | 32.29615756 | 10.62256206 |
| H | 2.563365137  | 31.7383458  | 7.90019906  |
| H | 3.794280678  | 32.9461992  | 8.275465191 |
| H | 0.892501146  | 32.94857683 | 9.299422689 |
| H | 3.13309963   | 35.0518172  | 9.695291201 |
| H | 2.357877981  | 34.05691044 | 10.97904562 |
| H | 1.406594591  | 35.30160601 | 10.10915884 |
| H | 2.28437281   | 34.71713289 | 7.185305634 |
| H | 0.582644336  | 34.87160246 | 7.7311715   |
| H | 1.114760987  | 33.4010374  | 6.850115663 |
| H | 2.496132137  | 29.21770044 | 8.789716542 |
| H | 1.533174681  | 27.37227474 | 9.988876551 |
| H | 0.408619661  | 27.48099267 | 8.594196053 |
| H | -0.664159318 | 27.62504343 | 11.1214296  |
| H | -1.196142172 | 28.82704144 | 9.90268993  |
| H | -0.388463995 | 30.41113535 | 11.50665593 |
| H | 0.764926032  | 29.25155819 | 12.22529636 |
| H | 1.973222312  | 29.24797146 | 6.704913965 |
| H | 2.601132789  | 30.88071352 | 4.823734142 |
| H | 1.332814246  | 30.83393885 | 3.550810337 |
| H | 3.042394007  | 27.02970169 | 7.048895641 |
| H | -0.296917953 | 29.82600334 | 5.171414474 |
| H | 0.295604106  | 31.41475737 | 5.736092951 |
| H | 6.793467082  | 28.84008611 | 10.33595967 |
| H | 5.402982698  | 27.73481589 | 10.45296603 |
| C | 6.463871191  | 29.87954838 | 4.462185636 |
| N | 5.177719638  | 29.49445928 | 4.108078812 |

|   |             |             |             |
|---|-------------|-------------|-------------|
| C | 6.952475822 | 30.72262073 | 3.475634621 |
| N | 5.942451174 | 30.85025521 | 2.545817288 |
| C | 4.886615767 | 30.10486133 | 2.952413369 |
| H | 3.940353109 | 30.01288841 | 2.409330599 |
| H | 5.976385751 | 31.40925161 | 1.689161486 |

---

**Table S14.** Cartesian coordinates for the geometry optimized structure of intermediate-spin  $\{\text{Fe(III)(nh}_2\text{)(O}_2^-)\}$  possessing an  $s = \frac{3}{2}$  Fe(III) center antiferromagnetically coupled to the  $s = \frac{1}{2}$  O<sub>2</sub><sup>-</sup> ( $J = -1379.70 \text{ cm}^{-1}$ )

|    |             |                   |              |
|----|-------------|-------------------|--------------|
| O  | 3.67227454  | 29.03779346518114 | 6.426268797  |
| O  | 4.041682209 | 30.3227718505028  | 6.63583812   |
| Fe | 4.167348056 | 28.02459582794835 | 4.941917127  |
| N  | 3.444306846 | 26.43053657504085 | 5.94809987   |
| C  | 4.523654915 | 25.41653024690968 | 6.072528836  |
| C  | 5.841836812 | 26.16187395564539 | 6.315962897  |
| O  | 6.801924047 | 25.58295923004404 | 6.871662985  |
| C  | 4.565340517 | 24.5347682886538  | 4.82519774   |
| C  | 4.801164279 | 25.29309712362543 | 3.553142763  |
| N  | 4.616730595 | 26.66834588411721 | 3.422319667  |
| C  | 5.174120223 | 24.77992359361261 | 2.330796178  |
| C  | 4.866806897 | 26.96161210092443 | 2.142926576  |
| N  | 5.20392794  | 25.84615924234353 | 1.462478526  |
| N  | 5.806352903 | 27.45310146661868 | 5.924758291  |
| C  | 6.951280328 | 28.26002959051254 | 6.342536375  |
| C  | 7.047305634 | 28.41082687197969 | 7.882973998  |
| O  | 8.141809739 | 28.56352639063874 | 8.444872446  |
| C  | 6.941402234 | 29.71388902620701 | 5.802776737  |
| N  | 5.850904307 | 28.46895146858024 | 8.523155608  |
| C  | 5.713684405 | 28.66660457273134 | 9.950224843  |
| C  | 4.769701016 | 29.77297448333377 | 10.439419650 |
| O  | 4.681709234 | 29.95198503749855 | 11.666953981 |
| N  | 4.052928732 | 30.48618589411539 | 9.540326952  |
| C  | 3.193037013 | 31.58871219711143 | 9.985429185  |

|   |              |                   |              |
|---|--------------|-------------------|--------------|
| C | 1.948698298  | 31.17700223506877 | 10.815349185 |
| O | 1.730982019  | 31.79207205330808 | 11.877912792 |
| C | 2.831836083  | 32.49440945399179 | 8.791520663  |
| C | 2.111335371  | 33.80896186589245 | 9.146782065  |
| C | 2.989954600  | 34.75681431511241 | 9.975416960  |
| C | 1.644353846  | 34.50076216421745 | 7.857541189  |
| N | 1.093156758  | 30.20305124851417 | 10.40728642  |
| C | 1.155798452  | 29.34245751426923 | 9.217966555  |
| C | 0.397025623  | 29.93022573622723 | 8.004858446  |
| O | -0.610262862 | 30.64788816897586 | 8.12903478   |
| C | 0.455837737  | 28.05192716620467 | 9.705547655  |
| C | -0.642703524 | 28.576974899151   | 10.641615167 |
| C | -0.002364378 | 29.79581568664257 | 11.3207867   |
| N | 0.898718676  | 29.52656446799761 | 6.818305266  |
| C | 0.36814961   | 29.92663431427217 | 5.519836542  |
| C | 1.473620238  | 29.99887551351542 | 4.462958988  |
| S | 2.177679021  | 28.37278622893903 | 3.963603286  |
| H | 2.608873276  | 26.02923290825352 | 5.510125475  |
| H | 4.340663825  | 24.77272093134772 | 6.945658537  |
| H | 3.61357159   | 23.97988949035336 | 4.762120957  |
| H | 5.353034405  | 23.77919306637268 | 4.957931506  |
| H | 5.407402121  | 23.76887898972199 | 2.017730608  |
| H | 4.821854665  | 27.93985293509683 | 1.683114831  |
| H | 5.442792886  | 25.81022679449428 | 0.474820456  |
| H | 7.882942888  | 27.7618840306663  | 6.030279698  |
| H | 5.018464383  | 28.28306520311742 | 7.961161107  |
| H | 4.164994394  | 30.35495718647781 | 8.515555394  |

|   |              |                   |                |
|---|--------------|-------------------|----------------|
| H | 3.771008398  | 32.17337805636222 | 10.715202700   |
| H | 2.218769827  | 31.92723851571287 | 8.074449376    |
| H | 3.772275955  | 32.73765287381197 | 8.268266694    |
| H | 1.212841293  | 33.56607254138046 | 9.740808479    |
| H | 3.901921812  | 35.02559846080136 | 9.417628162    |
| H | 3.296463054  | 34.31155904213767 | 10.932438657   |
| H | 2.448458697  | 35.68764434270542 | 10.201250816   |
| H | 2.504896133  | 34.75979259414137 | 7.219501359    |
| H | 1.1031974    | 35.43138485510699 | 8.084696337    |
| H | 0.974854291  | 33.85132110350027 | 7.274134288    |
| H | 2.197716622  | 29.14801718256972 | 8.940318751    |
| H | 1.186321743  | 27.44594456590661 | 10.261394299   |
| H | 0.070909101  | 27.44756997470466 | 8.874227788    |
| H | -0.962245548 | 27.82570643561881 | 11.3748919337  |
| H | -1.52254149  | 28.88320899866043 | 10.06056068338 |
| H | -0.708400993 | 30.62448138505884 | 11.4686560619  |
| H | 0.432318988  | 29.55025532959599 | 12.3017108852  |
| H | 1.818805758  | 29.07033603218945 | 6.810441292    |
| H | 2.28968998   | 30.64982073520399 | 4.805252567    |
| H | 1.048272495  | 30.43448256493673 | 3.54746571     |
| H | 3.157651842  | 26.76193485470338 | 6.876474252    |
| H | -0.421788646 | 29.22869032246162 | 5.194398686    |
| H | -0.096511800 | 30.91939901086584 | 5.62617903     |
| H | 6.711126975  | 28.89124196020028 | 10.352682617   |
| H | 5.369396925  | 27.74172280129482 | 10.442896487   |
| C | 6.3912182    | 29.95414054849787 | 4.440970811    |
| N | 5.144627589  | 29.4897091324224  | 4.037545676    |

|   |             |                   |             |
|---|-------------|-------------------|-------------|
| C | 6.85471757  | 30.83228822471239 | 3.48505925  |
| N | 5.874000698 | 30.90782470526567 | 2.52209395  |
| C | 4.857475491 | 30.0936209640454  | 2.880152234 |
| H | 3.949198926 | 29.96114186865385 | 2.303553757 |
| H | 5.901546874 | 31.47882480487894 | 1.681465078 |
| H | 7.967945432 | 30.10058804296102 | 5.849641561 |
| H | 6.326557853 | 30.32525031891556 | 6.484008446 |
| H | 7.764899135 | 31.41827789792616 | 3.433641903 |

**Table S15.** Cartesian coordinates for the geometry optimized structure of high-spin  $\{\text{Fe(III)(nh}_2\text{)(O}_2^-\}\}$  possessing an  $s = \frac{5}{2}$  Fe(III) center antiferromagnetically coupled to the  $s = \frac{1}{2}$   $\text{O}_2^-$  ( $J = -108.71 \text{ cm}^{-1}$ )

|    |             |             |             |
|----|-------------|-------------|-------------|
| O  | 3.870329476 | 29.2079583  | 6.5032063   |
| O  | 4.244784675 | 30.50257548 | 6.611166614 |
| Fe | 4.170231857 | 28.14559557 | 5.013990755 |
| N  | 3.269559117 | 26.68623331 | 6.055328196 |
| C  | 4.209061424 | 25.54638563 | 6.173439535 |
| C  | 5.614690607 | 26.12648203 | 6.395341144 |
| O  | 6.50032315  | 25.4686429  | 6.975883468 |
| C  | 4.136247708 | 24.66262308 | 4.928404047 |
| C  | 4.481818523 | 25.38705911 | 3.660434516 |
| N  | 4.454573131 | 26.77262907 | 3.528779421 |
| C  | 4.828431967 | 24.83468781 | 2.438211599 |
| C  | 4.770014601 | 27.04256825 | 2.255759812 |
| N  | 4.998876195 | 25.89569697 | 1.576295536 |
| N  | 5.735938144 | 27.39936906 | 5.943311112 |
| C  | 6.947122753 | 28.09025071 | 6.364022691 |
| C  | 7.038721211 | 28.19628167 | 7.907260317 |
| O  | 8.122595799 | 28.17619363 | 8.503979819 |
| C  | 7.050089094 | 29.54885501 | 5.857367632 |
| N  | 5.836546606 | 28.42574945 | 8.510125681 |
| C  | 5.700308355 | 28.63840635 | 9.929854397 |
| C  | 4.84129782  | 29.82135438 | 10.3896686  |
| O  | 4.672731778 | 29.98906054 | 11.60928514 |
| N  | 4.253701311 | 30.61088021 | 9.454619806 |
| C  | 3.351647461 | 31.68159979 | 9.877211593 |

|   |              |             |             |
|---|--------------|-------------|-------------|
| C | 2.196720457  | 31.20312098 | 10.79311137 |
| O | 1.949013928  | 31.82542863 | 11.8412513  |
| C | 2.855433325  | 32.45241439 | 8.638727642 |
| C | 1.734173309  | 33.47598777 | 8.881795756 |
| C | 2.130590852  | 34.55501601 | 9.900247156 |
| C | 1.312382106  | 34.09679538 | 7.54180573  |
| N | 1.44453495   | 30.12421376 | 10.43673297 |
| C | 1.485512051  | 29.34615382 | 9.197071053 |
| C | 0.667974693  | 30.02250373 | 8.074529682 |
| O | -0.336170615 | 30.71817994 | 8.29714982  |
| C | 0.835070358  | 28.01077929 | 9.619986756 |
| C | -0.254560878 | 28.46411071 | 10.60581792 |
| C | 0.394518305  | 29.64073116 | 11.35408956 |
| N | 1.140671586  | 29.73389102 | 6.83967224  |
| C | 0.621445401  | 30.30583497 | 5.608291688 |
| C | 1.718547106  | 30.3542542  | 4.542225432 |
| S | 2.260924165  | 28.68492436 | 3.976514118 |
| H | 2.370845155  | 26.39922506 | 5.639494309 |
| H | 3.961020522  | 24.92673958 | 7.058970472 |
| H | 3.112180999  | 24.233313   | 4.857108183 |
| H | 4.824352463  | 23.80541673 | 5.06731832  |
| H | 4.956140628  | 23.79419064 | 2.125479662 |
| H | 4.849077979  | 28.03166825 | 1.799311631 |
| H | 5.260424286  | 25.83671172 | 0.588297438 |
| H | 7.84124659   | 27.51373896 | 6.043357589 |
| H | 4.99801156   | 28.4264423  | 7.909747264 |
| H | 4.39895743   | 30.4985159  | 8.422422091 |

|   |              |             |              |
|---|--------------|-------------|--------------|
| H | 3.906755977  | 32.36986268 | 10.54787593  |
| H | 2.531608145  | 31.72038408 | 7.872744731  |
| H | 3.734780913  | 32.96969012 | 8.194353705  |
| H | 0.855478605  | 32.9208831  | 9.2800782310 |
| H | 3.045046553  | 35.0934052  | 9.5689110960 |
| H | 2.328145493  | 34.11042769 | 10.89533225  |
| H | 1.322082867  | 35.30629684 | 10.01777357  |
| H | 2.15194792   | 34.66555261 | 7.086812945  |
| H | 0.461247672  | 34.79652726 | 7.671771366  |
| H | 1.005053584  | 33.31533563 | 6.816458114  |
| H | 2.525558475  | 29.20103384 | 8.854310597  |
| H | 1.600143989  | 27.38863574 | 10.12897599  |
| H | 0.448168014  | 27.43949406 | 8.753939087  |
| H | -0.578870299 | 27.65939277 | 11.29319819  |
| H | -1.141526614 | 28.8189232  | 10.04531382  |
| H | -0.320080693 | 30.45470078 | 11.59054699  |
| H | 0.865686779  | 29.33006224 | 12.31170776  |
| H | 2.072584243  | 29.29099061 | 6.779023843  |
| H | 2.603849758  | 30.90395426 | 4.924528537  |
| H | 1.336665702  | 30.88333147 | 3.646236084  |
| H | 3.043386224  | 27.06278289 | 6.989998012  |
| H | -0.250122088 | 29.72270591 | 5.234418295  |
| H | 0.252048747  | 31.33339733 | 5.819600401  |
| H | 6.718989608  | 28.76886598 | 10.34879526  |
| H | 5.263683242  | 27.74889133 | 10.43752065  |
| C | 6.534312533  | 29.85108201 | 4.493783682  |
| N | 5.253367904  | 29.49456136 | 4.095117358  |

|   |             |             |             |
|---|-------------|-------------|-------------|
| C | 7.064265785 | 30.7014682  | 3.535298822 |
| N | 6.083512663 | 30.86190789 | 2.579613477 |
| C | 5.00392904  | 30.12891348 | 2.942500546 |
| H | 4.069795678 | 30.07050529 | 2.374465621 |
| H | 6.150573058 | 31.43660553 | 1.735284837 |
| H | 8.104641965 | 29.87274844 | 5.938132162 |
| H | 6.451828106 | 30.18994171 | 6.541189399 |
| H | 8.028018981 | 31.2162979  | 3.482363774 |

## References.

- 1) Ellman, G. L. Arch. Biochem Biophys. 1959, 82, 70-77.
- 2a) Scarrow, R. S.; Shearer, J. EXAFS123, Version 0.5; Trinity University: San Antonio, TX, 2019. 2b) Scarrow, R.C.; Strickler, B.S.; Ellison, J.J.; Shoner, S.C.; Kovacs, J.A.; Cummings, J.G.; Nelson, M.J. J. Am. Chem. Soc., 1998, 120, 9237-9245. 2c) Scarrow, R. C.; Trimitsis, M. G.; Buck, C. P.; Grove, G. N.; Cowling, R. A.; Nelson, M. J. Biochemistry, 1994, 33, 15023-15035. d) Rehr, J.J., Kas, J.J., Vila, F.D., Prange, M.P., Jorissen K., Phys. Chem. Chem. Phys., 2010, 12, 5503-5513.
- 3) Bunker, G.; Hasnain, S.; Sayers, D. X-ray Absorption Fine Structure; Hasnain, S. S., Ed.; Ellis Horwood: New York, 1991, pp 751-770.
- 4) Stavitski, E.; de Groot, F. M. F. Micron 2010, 41, 687-694.
- 5) Rose, K; Shadle, S.E.; Eldsness, M.K.; Kurtz, D.M.; Scott, R.A.; Hedman, B.; Hodgson, K.O.; Solomon, E.I. J. Am. Chem. Soc., 1998, 120, 10743-10747.
- 6) Neese, F. Wiley Interdiscip. Rev.: Comput. Mol. Sci., 2025, 15, 2, e70019
- 7) Soda, T.; Kitagawa, Y.; Onishi, T.; Takano, Y.; Shigeta, Y.; Nagao, H.; Yoshioka, Y.; Yamaguchi, K. Chem. Phys. Lett., 2000, 319, 223-230.
- 8) Pettersen EF, Goddard TD, Huang CC, Couch GS, Greenblatt DM, Meng EC, Ferrin TE. J Comput Chem. 2004, 25, 1605-1612.
